# Supplementary material for: High-throughput toxicogenomic screening of chemicals in the environment using metabolically competent hepatic cell cultures
Source: PubMed Central journal article supplement (PMC7840683; doi:10.1038/s41540-020-00166-2), 2021-01-27
Supplement: 41540_2020_166_MOESM1_ESM.pdf [file 41540_2020_166_MOESM1_ESM.pdf]

# Supplementary Materials for High-Throughput Toxicogenomic Screening of Chemicals in the Environment Using Metabolically Competent Hepatic Cell Cultures

Authors:

Jill A. Franzosa<sup>1</sup>, Jessica A. Bonzo<sup>2</sup>, John Jack<sup>1</sup>, Nancy C. Baker<sup>1</sup>, Parth Kothiya<sup>1</sup>, Rafal P. Witek<sup>2</sup>, Patrick Hurban<sup>3</sup>, Stephen Siferd<sup>3</sup>, Susan Hester<sup>1</sup>, Imran Shah<sup>1</sup>, Stephen S. Ferguson<sup>4</sup>, Keith A. Houck<sup>1</sup>, John F. Wambaugh<sup>1,\*</sup>

<sup>1</sup>Center for Computational Toxicology and Exposure, Office of Research and Development, U.S. EPA, Research Triangle Park, NC 27711

<sup>2</sup>Cell Biology, Biosciences Division, Thermo Fisher Scientific

<sup>3</sup>Expression Analysis

<sup>4</sup>Division of National Toxicology Program, National Institutes of Environmental Health Sciences of National Institutes of Health, Durham, NC, USA, 27709.

\*Corresponding Author:

109 T.W Alexander Dr., NC 27711, USA

[Wambaugh.john@epa.gov](mailto:Wambaugh.john@epa.gov)

Phone: (919) 541-7641; fax: (919) 541-1194

## Contents

|                                                                          |    |
|--------------------------------------------------------------------------|----|
| Supplementary Figures .....                                              | 4  |
| Supplementary Methods.....                                               | 8  |
| DeltaCT Calculations (LTEA Data Analysis: Level 2-3 Normalization) ..... | 8  |
| R Code for Bayesian Analysis .....                                       | 10 |
| heparg-ref-step1-analysis-072017.R.....                                  | 10 |
| heparg-ref-step2-analysis-112917.R.....                                  | 12 |
| heparg-tox-analysis-042318.r .....                                       | 17 |
| load-hepdata-121117.R .....                                              | 24 |
| analyze-step1-112917.R.....                                              | 31 |
| build-posterior-network-043018.r.....                                    | 34 |
| create.model-042018.r .....                                              | 35 |
| create-NR-prior-tables-033116.R.....                                     | 39 |
| create-refchem-figure-052218.R .....                                     | 41 |
| do.JAGS-090617.R.....                                                    | 43 |
| get-NRs-and-RefChems-070715.R .....                                      | 46 |
| heatmap.3.r.....                                                         | 47 |
| myclust.R.....                                                           | 57 |
| plot.data-062915.R .....                                                 | 58 |
| plot_NR_graph_posterior-070615.R.....                                    | 60 |
| plot-NR-AC50-prior-112415.R.....                                         | 62 |
| plot-NR-inference-043018.r .....                                         | 63 |
| toxcast["NOCAS_47351","PREFERRED.NAME"] <- "SSR 240612" .....            | 63 |
| posterior-analysis-043018.r .....                                        | 65 |
| prepare-JAGS-run-012916.R .....                                          | 68 |
| read-literature-prior-072017.R.....                                      | 69 |
| ToxCast-NRInference-figure-052218.R.....                                 | 70 |
| JAGS Code for Bayesian Analysis.....                                     | 73 |
| HepaRG-Ref-Step1-Jul17-2017-07-20.jags.....                              | 73 |
| HepaRG-Ref-Step2-Nov2017-2017-11-30.jags .....                           | 75 |
| HepaRG-ToxCast-Apr2018All-2018-04-23.jags .....                          | 77 |

Supplementary Material for “High-Throughput Toxicogenomic Screening of Chemicals in the Environment Using Metabolically Competent Hepatic Cell Cultures”

Other Supplementary Files:

**SupplementaryTables.xlsx:** A Microsoft Excel workbook containing many tables (“sheets”) referred to in the main text.

The following data sets are too large to provide as part of the publication are publicly available at [ftp://newftp.epa.gov/COMPTOX/CCTE\\_Publication\\_Data/CCED\\_Publication\\_Data/Wambaugh/ToxCast\\_LTEA/](ftp://newftp.epa.gov/COMPTOX/CCTE_Publication_Data/CCED_Publication_Data/Wambaugh/ToxCast_LTEA/):

**LTEA\_Inucyte\_Images.zip:** The images of each well containing a HepaRG™ cell culture (15.8 GB)

**LTEA\_Level2\_20191119.zip:** LDH and transcriptional concentration-response fold-change data (37.9 MB)

**LTEA\_Level5\_20191119.zip:** The ToxCast curve fits of the transcriptomic and LDH data (30.5 MB)

All ToxCast data and curve fits may also be viewed at <https://comptox.epa.gov/dashboard/>

## Supplementary Figures

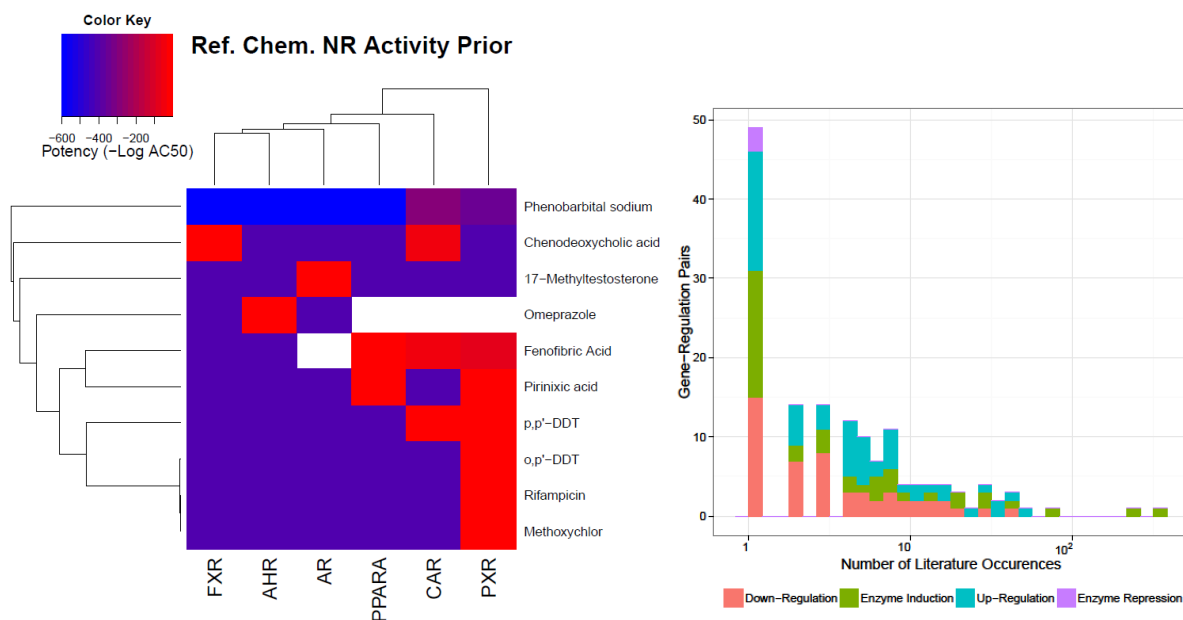

Supplementary Figure 1: A Bayesian model was used to infer receptor activation from a combination of the new transcriptional data and prior information: (at left) Curation of *in vitro* data identified receptor 50% activation concentrations (potencies) for the ten reference chemicals. Rows (chemicals) and columns (receptors) are hierarchically clustered according to Euclidean distance using complete linkage such that more similar rows and columns are near each other. Color in the heatmap indicates the potency, with white indicating instances where no data were available. (at right) Co-occurring mentions of receptors and transcripts were curated from the published literature. The histogram shows that most occurrences were of a single instance of a receptor and transcript being mentioned, while in some cases there were several hundred occurrences. The heatmap was created with R package ComplexHeatmap<sup>97</sup> using hierarchical clustering with complete linkage and an Euclidean distance.

## Reference Plate

|   | 1    | 2    | 3         | 4         | 5    | 6    | 7          | 8          | 9     | 10    | 11   | 12           |
|---|------|------|-----------|-----------|------|------|------------|------------|-------|-------|------|--------------|
| A | PB.1 | PB.1 | OMP.<br>1 | OMP.<br>1 | FF.1 | FF.1 | CDCA.<br>1 | CDCA.<br>1 | AFL.1 | AFL.1 | DMSO | DMSO         |
| B | PB.2 | PB.2 | OMP.<br>2 | OMP.<br>2 | FF.2 | FF.2 | CDCA.<br>2 | CDCA.<br>2 | AFL.2 | AFL.2 | DMSO | DMSO         |
| C | PB.3 | PB.3 | OMP.<br>3 | OMP.<br>3 | FF.3 | FF.3 | CDCA.<br>3 | CDCA.<br>3 | AFL.3 | AFL.3 |      | Total lysate |
| D | PB.4 | PB.4 | OMP.<br>4 | OMP.<br>4 | FF.4 | FF.4 | CDCA.<br>4 | CDCA.<br>4 | AFL.4 | AFL.4 |      | Total lysate |
| E | PB.5 | PB.5 | OMP.<br>5 | OMP.<br>5 | FF.5 | FF.5 | CDCA.<br>5 | CDCA.<br>5 | AFL.5 | AFL.5 |      | EA           |
| F | PB.6 | PB.6 | OMP.<br>6 | OMP.<br>6 | FF.6 | FF.6 | CDCA.<br>6 | CDCA.<br>6 | AFL.6 | AFL.6 |      | EA           |
| G | PB.7 | PB.7 | OMP.<br>7 | OMP.<br>7 | FF.7 | FF.7 | CDCA.<br>7 | CDCA.<br>7 | AFL.7 | AFL.7 |      | EA           |
| H | PB.8 | PB.8 | OMP.<br>8 | OMP.<br>8 | FF.8 | FF.8 | CDCA.<br>8 | CDCA.<br>8 | AFL.8 | AFL.8 |      | EA           |

} No cells

CAR/PXR PB: Phenobarbital

AhR OMP: Omeprazole

PPAR $\alpha$  FF: Fenofibric Acid

FXR CDCA: Chenodeoxycholic Acid

Toxicity AFL: Aflatoxin B1

DMSO: Vehicle control

Total Lysate: LDH assay control

EA: Empty wells for EA to add universal human reference RNA

*Supplementary Figure 2: Seven reference chemical plates were interspersed throughout the experimental process. Reference chemical plates contained both reference chemicals for metabolic activity (aflatoxin b1) and reference receptor activators.*

Supplementary Material for “High-Throughput Toxicogenomic Screening of Chemicals in the Environment Using Metabolically Competent Hepatic Cell Cultures”

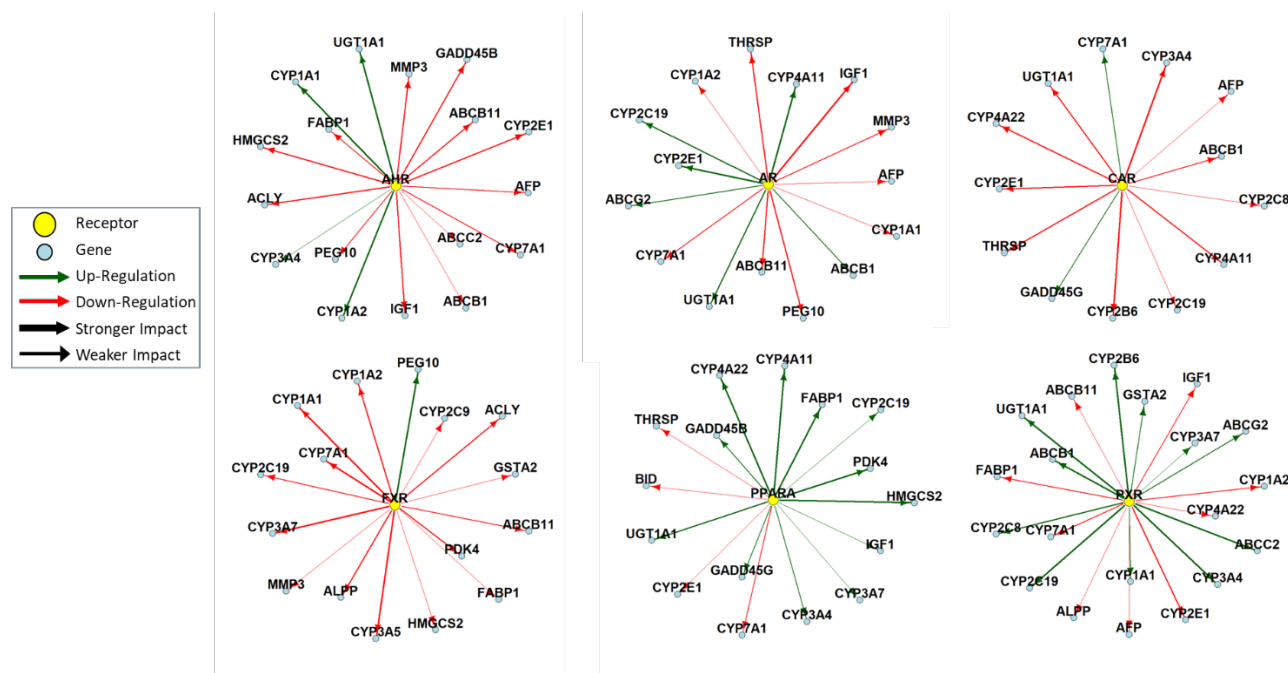

Supplementary Figure 3: Each network represents the direction and magnitude of interaction for the six receptors in HepaRG™ cultures as determined using the entire chemical library as a set of test perturbations.

## Test Compound Plate

|   | 1     | 2   | 3   | 4   | 5   | 6   | 7   | 8   | 9   | 10  | 11  | 12           |
|---|-------|-----|-----|-----|-----|-----|-----|-----|-----|-----|-----|--------------|
| A | PB.1  | 1.1 | 2.1 | 3.1 | 4.1 | 5.1 | 1.1 | 2.1 | 3.1 | 4.1 | 5.1 | DMSO         |
| B | PB.2  | 1.2 | 2.2 | 3.2 | 4.2 | 5.2 | 1.2 | 2.2 | 3.2 | 4.2 | 5.2 | DMSO         |
| C | PB.3  | 1.3 | 2.3 | 3.3 | 4.3 | 5.3 | 1.3 | 2.3 | 3.3 | 4.3 | 5.3 | Total lysate |
| D | AFL.1 | 1.4 | 2.4 | 3.4 | 4.4 | 5.4 | 1.4 | 2.4 | 3.4 | 4.4 | 5.4 | Total lysate |
| E | AFL.2 | 1.5 | 2.5 | 3.5 | 4.5 | 5.5 | 1.5 | 2.5 | 3.5 | 4.5 | 5.5 | EA           |
| F | AFL.3 | 1.6 | 2.6 | 3.6 | 4.6 | 5.6 | 1.6 | 2.6 | 3.6 | 4.6 | 5.6 | EA           |
| G | DMSO  | 1.7 | 2.7 | 3.7 | 4.7 | 5.7 | 1.7 | 2.7 | 3.7 | 4.7 | 5.7 | EA           |
| H | DMSO  | 1.8 | 2.8 | 3.8 | 4.8 | 5.8 | 1.8 | 2.8 | 3.8 | 4.8 | 5.8 | EA           |

} No cells

1.1, 2.1, 3.1, ..., 5.8 ToxCast compound N, dilution 1, 2, 3,...

PB Phenobarbital

DMSO Vehicle control

Total Lysate LDH assay control

AFL Aflatoxin B1

EA Empty wells for EA: one no template control, one no enzyme control,  
and two for universal human reference RNA

Supplementary Figure 4: Each test chemical plate contained duplicate eight-point dilutions of five ToxCast compounds.

## Supplementary Methods

### DeltaCT Calculations (LTEA Data Analysis: Level 2-3 Normalization)

We should have unique Ref Genes values for each well. All this data is in level2. In level3 we have the all the same ref.gene.mean values for an individual chemical treatment. The reference gene expression should be approximately the same per treatment and concentration, yet, there could be slight variations that we want to capture.

Here, perhaps we just want to take the mean of the housekeeping gene assays based on the sample\_tech\_rep\_id (individual well). Example for TX011582\_1:

1) Ref\_GENE\_Mean (TX011582\_1) = Mean (Raw\_ct\_value(TX011582\_1(ltea\_act));Raw\_ct\_value\_TX011582\_1(ltea\_gadh);Raw\_ct\_value (TX011582\_1(ltea\_polr2a))]

Calculating the delta Ct is the next step. This would involve subtracting the Ref\_Gene\_Mean for an sample\_tech\_rep\_id (individual well) from every all of the assays for that sample\_tech\_rep\_id

2) delta Ct (LTEA\_abcb1) = Raw\_ct\_value(TX011582\_1,LTEA\_abcb1) – Ref\_GENE\_Mean (TX011582\_1) –equation 1

We should also have unique DMSO means for each assay and plate combination in Level 3. The question here is did DMSO affect the expression of that specific gene (assay) on that plate? The data is all there in the plate level, LEVEL2 files. In Level 3 we have the same DMSO mean listed for all the plates and assays.

Here’s an example equation for calculating the dms0\_mean for a specific assay and plate:

1) delta\_ct\_DMSO(plateX, well X#, LTEA\_cyp3a4) =Raw\_ct\_value DMSO(plateX, well X#, cyp3a4) – [Mean(Raw\_ct\_value DMSO(plateX, well X#,,act);Raw\_ct\_value DMSO(plate1, well X#,gadh);Raw\_ct\_value DMSO(plate1, well X#,polr2a))]

\*Will have four of the values (for each of the 4 DMSO wells) for each assay on an individual plate. The mean of these will be equation 2). Parth has them nicely labeled as DMSO\_1 -4 on each sheet.

In the example above, sample\_tech\_rep\_id can be substituted for wellX#

2) delta\_ct\_DMSO\_mean(plateX,assay\_cyp3a4) = Mean (delta\_ct \_DMSO\_1(plateX, well X#, assay\_cyp3a4), delta\_ct \_DMSO\_2(plateX, well X#, assay\_cyp3a4), delta\_ct \_DMSO\_3(plateX, well X#, assay\_cyp3a4), delta\_ct \_DMSO\_4(plateX, well X#, assay\_cyp3a4))

The DMSO is only labeled in the sample\_rep\_id column. Could this possibly be attributing to its processing from level 2 to 3? Would we want to include it in the chemical name, also?



Other descriptive data already in Level3 file should be included left

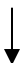

| Sample_tech_rep_id | assay_name | Raw_Ct_value        | House_keep_Mean_Ct                                                    | delta_Ct_value                             | delta_Ct_DMSO_Mean | delta_delta_Ct_value                         | Fold Change                           |
|--------------------|------------|---------------------|-----------------------------------------------------------------------|--------------------------------------------|--------------------|----------------------------------------------|---------------------------------------|
| TX#####_1          | LTEA_assay | From Raw Data Files | = Mean of the three housekeeping gene assays (actb, gapdh, p Mean Ct) | = (Raw_Ct_value) - (House_keeping Mean Ct) | See Below          | = ( delta_Ct_value ) - (delta_Ct_DMSO_Mean ) | = 2 <sup>-(delta - delta_Ct_val</sup> |

1. Calculate the delta\_ct\_DMSO\_# for each of the 4 DMSO wells on a plate  

$$\text{delta\_Ct\_DMSO\_}\# = (\text{Raw\_Ct\_value}_{(\text{DMSO\_1,plateX,assay})} - (\text{House\_keep\_Mean\_Ct}_{(\text{DMSO\_1,plateX})}) - \text{see above}$$
 \*Consider making a DMSO\_PLATE\_WELL ID similar to the sample\_tech\_rep\_id for the DMSOs

2. Take the Mean of all 4 DMSOs well for that specific assay  

$$\text{delta\_Ct\_DMSO\_Mean} = \text{Mean}(\text{delta\_Ct\_DMSO\_1}; \text{delta\_Ct\_DMSO\_2}; \text{delta\_Ct\_DMSO\_3}; \text{delta\_Ct\_DMSO\_4})$$
 •These will be gene/assay specific

Do we want to incorporate the intermediate values calculated into the Level3

## R Code for Bayesian Analysis

heparg-ref-step1-analysis-072017.R

```
library(runjags)
library(gdata)
library(parallel)
library(gplots)
library(ggplot2)
library(scales)
library(data.table)
```

```
# Get rid of anything in the workspace:
rm(list=ls())
```

```
#####
# CONFIGURATION VARIABLES #####
```

```
source("create.model-072017.R")
```

```
#Set the filename stub:
FILENAME <- "HepaRG-Ref-Step1-Jul17"
```

```
# The number of Markov Chains used:
NUM.CHAINS <- 6
```

```
#Set the name of the BUGS file:
RJAGS.MODEL.FILE <- paste(FILENAME,"-",Sys.Date(),".jags",sep="")
```

```
# For the initial analysis we look at all genes with reference chem activity:
RESTRICT.TO.SIGNIFICANT.GENES <- FALSE
```

```
# Name of the ToxCast Curve fit file
HEPARG.table <- "LTEA_Level5&6_20150922.csv"
```

```
# Literature activities of the reference chemicals:
NR.CHEM.PRIOR.TABLE <- "NR-prior-ToxCast Assay Data-071315.xlsx"
```

```
# We repeat the observations from the reference plates in order to weight them
# appropriately (more observations should mean more weight)
NUM.REFERENCE.PLATES <- 7
```

```
#Are we analyzing the reference chems or the ToxCast library
REFERENCE.CHEMS <- TRUE
```

```
# Literature NR-Gene interactions:
```

Supplementary Material for "High-Throughput Toxicogenomic Screening of Chemicals in the Environment Using Metabolically Competent Hepatic Cell Cultures"

LITERATURE.NR.GENE.INTERACTIONS<- "LitConnectionsForPriors\_v3.xlsm"

```
# END CONFIGURATION VARIABLES #####  
#####
```

```
# Now read in the chemical-specific NR interaction prior information (Jill/John):  
source("get-NRs-and-RefChems-070715.R")
```

```
# Create the hepdata table with the simplified LTEA data:  
source("load-hepdata-072417.R")
```

```
repdata <- subset(hepdata,casn%in%c("474-25-9","57-30-7","73590-58-6","42017-89-0"))  
for (i in 1:(NUM.REFERENCE.PLATES-1)) hepdata <- rbind(hepdata,repdata)
```

```
# We use these tables as arguments to the function that builds the JAGS model:  
source("create-NR-prior-tables-032616.R")
```

```
# Read table of literature NR-gene interactions with direction (Nancy Baker):  
source("read-literature-prior-072017.R")
```

```
# Create the BUGS file:  
create.ref.model(RJAGS.MODEL.FILE,1)
```

```
save.image(paste(FILENAME,"-",Sys.Date(),"-preJAGS.RData",sep=""))
```

```
source("do.JAGS-090617.R")  
cl1 <- makeCluster(Num.NR,outfile=paste(FILENAME,"-clusterlog",Sys.Date(),".txt",sep=""))  
clusterExport(cl1,list("FILENAME","NUM.CHAINS"))  
clusterEvalQ(cl=cl1,setwd("/Users/jwambaug/Desktop/heparg"))  
clusterEvalQ(cl=cl1,source("/Users/jwambaug/Desktop/heparg/prepare-JAGS-run-012916.R"))  
outlist <- clusterApply(cl1, NRs, do.JAGS)  
save.image(paste(FILENAME,"-",Sys.Date(),".RData",sep=""))  
clusterEvalQ(cl =cl1,stopCluster(cl2))  
stopCluster(cl1)
```

```
# Get rid of anything in the workspace:  
rm(list=ls())
```

heparg-ref-step2-analysis-112917.R

```
library(runjags)
```

```
library(gdata)
```

```
library(parallel)
```

```
library(gplots)
```

```
library(devtools)
```

```
library(ggplot2)
```

```
library(scales)
```

```
# Get rid of anything in the workspace:
```

```
rm(list=ls())
```

```
#####  
# CONFIGURATION VARIABLES #####
```

```
source("create.model-072017.R")
```

```
#Set the filename stub:
```

```
FILENAME <- "HepaRG-Ref-Step2-Nov2017"
```

```
# The number of Markov Chains used:
```

```
NUM.CHAINS <- 6
```

```
#Set the name of the BUGS file:
```

```
RJAGS.MODEL.FILE <- paste(FILENAME,"-",Sys.Date(),".jags",sep="")
```

```
# For the initial analysis we look at all genes with reference chem activity:
```

```
RESTRICT.TO.SIGNIFICANT.GENES <- TRUE
```

```
#Significant genes from step 1 analysis:
```

```
SIGNIF.GENES <- "HepaRG-Ref-Step1-Jul17-signifgenes-2017-11-29.RData"
```

```
# Name of the ToxCast Curve fit file
```

```
HEPARG.table <- "LTEA_Level5&6_20150922.csv"
```

```
# Literature activities of the reference chemicals:
```

```
NR.CHEM.PRIOR.TABLE <- "NR-prior-ToxCast Assay Data-071315.xlsx"
```

```
# We repeat the observations from the reference plates in order to weight them
```

```
# appropriately (more observations should mean more weight)
```

```
NUM.REFERENCE.PLATES <- 7
```

```
#Are we analyzing the reference chems or the ToxCast library
```

```
REFERENCE.CHEMS <- TRUE
```

```
# Literature NR-Gene intractions:
```

```
LITERATURE.NR.GENE.INTERACTIONS<- "LitConnectionsForPriors_v3.xlsm"
```

Supplementary Material for "High-Throughput Toxicogenomic Screening of Chemicals in the Environment Using Metabolically Competent Hepatic Cell Cultures"

```
# END CONFIGURATION VARIABLES #####
#####

if (file.exists(paste(FILENAME,"-PREJAGS-",Sys.Date(),".RData",sep="")))
{
  load(paste(FILENAME,"-PREJAGS-",Sys.Date(),".RData",sep=""))
} else {
  NR.genes <- NULL

  # Now read in the chemical-specific NR interaction prior information (Jill/John):
  source("get-NRs-and-RefChems-070715.R")

  # Create the hepdata table with the simplified LTEA data:
  source("load-hepdata-072417.R")

  repdata <- subset(hepdata,casn%in%c("474-25-9","57-30-7","73590-58-6","42017-89-0"))
  for (i in 1:(NUM.REFERENCE.PLATES-1)) hepdata <- rbind(hepdata,repdata)

  # We use these tables as arguments to the function that builds the JAGS model:
  source("create-NR-prior-tables-033116.R")

  # Read table of literature NR-gene interactions with direction (Nancy Baker):
  source("read-literature-prior-072017.R")

  # Create the BUGS file:
  create.ref.model(RJAGS.MODEL.FILE,Num.NR)

  # We need a function to turn NR states into binary numbers:
  to.binary <- function(x,bits=5)
  {
    tmp <- paste(sapply(strsplit(paste(rev(intToBits(x))),""),`[,2),collapse="")
    return(substr(tmp,nchar(tmp)-bits+1,nchar(tmp)))
  }

  # And we use this to build a table of which NR's are off (0) or on (1) for each state:
  NR.cat.boolean <- NULL
  for(i in 0:(2^Num.NR-1)) NR.cat.boolean <-
  cbind(NR.cat.boolean,as.numeric(strsplit(to.binary(i,Num.NR),""))[[1]])

  # Create a small cluster with a core for each chain in the analysis:
  cl2 <- makeCluster(NUM.CHAINS)

  inits <- list()
  for (chain in 1:NUM.CHAINS)
  {
    NR.Gene.Network <- matrix(NA,nrow=Num.Genes,ncol=Num.NR)
    rownames(NR.Gene.Network) <- NR.genes
```

Supplementary Material for “High-Throughput Toxicogenomic Screening of Chemicals in the Environment Using Metabolically Competent Hepatic Cell Cultures”

```
colnames(NR.Gene.Network) <- NRs
for (this.gene in NR.genes)
{
  for (this.NR in NRs)
  {
    if (!is.na(step1.NR.weight.med[this.NR,this.gene])) NR.Gene.Network[this.gene,this.NR] <- runif(1,
step1.NR.weight.low[this.NR,this.gene], step1.NR.weight.high[this.NR,this.gene])
    else NR.Gene.Network[this.gene,this.NR] <- 0
  }
  NR.AC50.index <- NR.Chem.Prior.Mean
  NR.AC50.index[] <- NA
}
for (this.NR in NRs)
{
  for (this.chem in Chem.Names)
  {
    if (length(which(NR.Chem.Prior[this.chem,,this.NR]==1))==1)
    {
      NR.AC50.index[this.chem,this.NR] <- which(NR.Chem.Prior[this.chem,,this.NR]==1)
    } else {
      NR.AC50.index[this.chem,this.NR] <- sample(which(NR.Chem.Prior[this.chem,,this.NR]==1),1)
    }
  }
}
inits[[paste("inits",chain,sep="")] <- list(
  .RNG.seed=as.numeric(paste(rep(chain,6),sep="","",collapse="")),
  .RNG.name="base::Super-Duper",
  Lit.Obs=rep(0.2,Num.Lit.Obs),
  log.Lit.Obs.Precision=runif(1,-6,-3),
  NR.Gene.Network=NR.Gene.Network,
  NR.AC50.index=matrix(NR.AC50.index,nrow=Num.Chems,ncol=Num.NR),
  P2min=runif(Num.Genes,0.1,0.2),
  P3min=runif(Num.Genes,0.1,0.2),
  Lit.Threshold=0.1)
}

jags.data <- list('Obs.State' = hepdata[, "state"],
  'Num.Obs' = Num.Obs,
  'Num.Genes' = Num.Genes,
  'Num.Concs' = Num.Concs,
  'Num.Chems' = Num.Chems,
  'Num.NR' = Num.NR,
  'NR.Chem.Prior' = NR.Chem.Prior,
  'NR.cat.boolean' = NR.cat.boolean,
  'Concs.Tested' = Concs.Tested,
  'Chem.Possible.AC50s' = Chem.Possible.AC50s,
  'Obs.Chem' = hepdata[, "chem.id"],
  'Obs.Conc' = hepdata[, "conc.id"],
```

Supplementary Material for “High-Throughput Toxicogenomic Screening of Chemicals in the Environment Using Metabolically Competent Hepatic Cell Cultures”

```
'Obs.Gene' = hepdata["gene.id"],
'Num.Lit.Obs' = Num.Lit.Obs,
'Lit.Obs'= rep(NA,Num.Lit.Obs),
'is.Signif.Lit.Obs' = rep(1,Num.Lit.Obs),
'Lit.Obs.Gene'= NR.gene.prior.final["gene.id"],
'Lit.Obs.NR'= NR.gene.prior.final["NR.id"]
)

save(inits,jags.data,RJAGS.MODEL.FILE,NUM.CHAINS,NR.genes,Chem.Names,file=paste(FILENAME,"-
PREJAGS-",Sys.Date(),".RData",sep=""))
}

cat(paste("\n\nBeginning a Bayesian run with ",Num.Obs," observations of gene expression for
",Num.Chems," chemicals.\n\nInferring an interaction matrix of ",Num.Genes," genes driven by ",Num.NR,"
nuclear receptors.\n\nPrior information on NR-gene interactions taken from ",Num.Lit.Obs," journal
articles.\n\n",sep=""))

coda.out <- autorun.jags(RJAGS.MODEL.FILE,
  n.chains = NUM.CHAINS,
  method="parallel", method.options=list(cl=cl2),
  summarise=T,
  inits = inits,
  max.time="2d",
  startsample=4000,
  adapt=5000,
  startburnin=10000,
  thin.sample=T,
  psrf.target = 1.1,
  data = jags.data,
  monitor = c('NR.Gene.Network'))

save(coda.out,NR.genes,Chem.Names,Ref.chems,Num.NR,NRs,SIGNIF.GENES,file=paste(FILENAME,"-
",Sys.Date(),".RData",sep=""))

coda.out<-extend.jags(coda.out,
  sample=4000,
  adapt=5000,
  thin=10,
  add.monitor = c('NR.AC50',
    'NR.AC50.index',
    'P2min',
    'P3min',
    'Lit.Obs.Precision',
    'Lit.Threshold'))

save(coda.out,NR.genes,Chem.Names,Ref.chems,Num.NR,NRs,SIGNIF.GENES,file=paste(FILENAME,"-
",Sys.Date(),"-2.RData",sep=""))
```

Supplementary Material for “High-Throughput Toxicogenomic Screening of Chemicals in the Environment Using Metabolically Competent Hepatic Cell Cultures”

```
stopCluster(cl2)
```

```
# Get rid of anything in the workspace:
```

```
rm(list=ls())
```



Supplementary Material for “High-Throughput Toxicogenomic Screening of Chemicals in the Environment Using Metabolically Competent Hepatic Cell Cultures”

heparg-tox-analysis-042318.r

library(runjags)

library(gdata)

library(parallel)

library(gplots)

library(devtools)

library(ggplot2)

library(scales)

# Read the results of the reference chem analysis:

load("HepaRG-Ref-Step2-Nov2017-2017-12-10-2.RData")

# Get rid of anything but the MCMC output and the reference chemicals:

rm(list=ls()[!(ls)%in%c("Ref.chems", "coda.out", "Num.NR", "NRs", "NR.genes")]))

# Kludge because I forgot to save some of these:

Ref.chems <- c("474-25-9", "57-30-7", "13292-46-1", "789-02-6", "50892-23-4", "58-18-4", "50-29-3", "42017-89-0", "72-43-5", "73590-58-6")

NRs <- c("AHR", "AR", "CAR", "FXR", "PPARA", "PXR")

Num.NR <- 6

#####  
# CONFIGURATION VARIABLES #####

source("create.model-042018.R")

JAGS.PATH <- "/usr/local/bin/jags"

#Random number generator seed:

SEED <- 111111

#Set the filename stub:

FILENAME <- "HepaRG-ToxCast-Apr2018All"

# The number of Markov Chains used:

NUM.CHAINS <- 5

# How many subsets do we divide the data into:

DIVIDE.DATA <- 1

#Gens found to big significant in step 1 analysis:

SIGNIF.GENES<-"HepaRG-Ref-Step1-Jul17-signifgenes-2017-11-29.RData"

# Graph with only the significant (above threshold) genes:

GRAPH.FROM.INITIAL.ANALYSIS <- "HepaRG-Ref-Step2-Nov2017-NRgraph-Threshold1-Dropped-Posterior-Graph-2017-12-11.RData"

RESTRICT.TO.SIGNIFICANT.GENES <- TRUE

RJAGS.MODEL.FILE <- paste(FILENAME, "-", Sys.Date(), ".jags", sep="")

Supplementary Material for “High-Throughput Toxicogenomic Screening of Chemicals in the Environment Using Metabolically Competent Hepatic Cell Cultures”

```
# Name of the ToxCast Curve fit file
HEPARG.table <-"LTEA_Level5&6_20150922.csv"

#Are we analyzing the reference chems or the ToxCast library
REFERENCE.CHEMS <- FALSE

# END CONFIGURATION VARIABLES #####
#####

if (file.exists(paste(FILENAME,"-PREJAGS.RData",sep="")))
{
  load(paste(FILENAME,"-PREJAGS.RData",sep=""))
} else {
  # Read the output from the JAGS analysis of the reference chemicals to use a multivariate
  # normal prior:
  out.mcmc <- as.matrix(coda.out$mcmc[[1]])
  for (i in 2:length(coda.out$mcmc)) out.mcmc <- rbind(out.mcmc,as.matrix(coda.out$mcmc[[i]]))
  cn <- colnames(out.mcmc)
  # This is big so lets not keep it around:
  rm(coda.out)
  # Keep only the regulator model paramters:
  out.mcmc <- out.mcmc[,regexpr("AC50",cn)==-1&regexpr("Lit",cn)==-1]
  cn <- colnames(out.mcmc)
  P.include.vars <- cn[regexpr("min",cn)!=-1]
  P.multi.mu <- apply(out.mcmc[,P.include.vars],2,mean)
  P.multi.omega <- solve(cov(out.mcmc[,P.include.vars]))

  NR.include.vars <- cn[regexpr("min",cn)==-1]
  NR.Gene.Network.mu <- apply(out.mcmc[,NR.include.vars],2,mean)
  NR.include.vars <- names(NR.Gene.Network.mu[abs(NR.Gene.Network.mu)>0.5])
  NR.Gene.Network.mu <- apply(out.mcmc[,NR.include.vars],2,mean)
  temp <-out.mcmc[,NR.include.vars]-NR.Gene.Network.mu
  for (i in 1:length(NR.Gene.Network.mu)) temp[,i] <- temp[,i]/NR.Gene.Network.mu[i]
  NR.Gene.Network.omega <- solve(cov(temp))

  # Create the hepdata table with the simplified LTEA data:
  source("load-hepdata-121117.R")
  create.toxcast.model(RJAGS.MODEL.FILE,Num.NR)

  Chem.Possible.AC50s <- sort(unique(as.vector(Concs.Tested[!is.na(Concs.Tested)])))
  Chem.Possible.AC50s <- sort(c(Chem.Possible.AC50s,min(Chem.Possible.AC50s,na.rm=T)-
0.5,max(Chem.Possible.AC50s,na.rm=T)+0.5))
  NR.Chem.Prior <- matrix(0,nrow=Num.Chems,ncol=length(Chem.Possible.AC50s))

  NR.Chem.Prior[,1] <- 1
  NR.Chem.Prior[,dim(NR.Chem.Prior)[2]] <- 1
```

Supplementary Material for “High-Throughput Toxicogenomic Screening of Chemicals in the Environment Using Metabolically Competent Hepatic Cell Cultures”

```
rownames(NR.Chem.Prior) <- Chem.Names
colnames(NR.Chem.Prior) <- Chem.Possible.AC50s

# Only sample among the tested concentrations for each chemical:
for (this.chem in Chem.Names)
  NR.Chem.Prior[this.chem,as.character(Concs.Tested[this.chem,1:5])] <- 1

# We need a function to turn NR states into binary numbers:
to.binary <- function(x,bits=5)
{
  tmp <- paste(sapply(strsplit(paste(rev(intToBits(x))),""),`[,2],collapse="")
  return(substr(tmp,nchar(tmp)-bits+1,nchar(tmp)))
}

# And we use this to build a table of which NR's are off (0) or on (1) for each state:
NR.cat.boolean <- NULL
for(i in 0:(2^Num.NR-1)) NR.cat.boolean <-
cbind(NR.cat.boolean,as.numeric(strsplit(to.binary(i,Num.NR),""))[[1]])

save.image(file=paste(FILENAME,"-PREJAGS.RData",sep=""))
}

# Create a small cluster with a core for each chain in the analysis:
cl2 <- makeCluster(NUM.CHAINS)

set.seed(SEED)
which.subset <- sample(1:DIVIDE.DATA,Num.Chems,replace=T)
names(which.subset) <- Chem.Names
coda.out <- list()

#Any Nr weights that aren't being estimated are set to zero:
non.zero.weights <- NULL
names(NR.Gene.Network.mu)[regexr("NR.Gene",names(NR.Gene.Network.mu))!=1] <-
non.zero.gene <- NULL
non.zero.NR <- NULL
NR.Gene.Network.data <- matrix(0,nrow=Num.Genes,ncol=Num.NR)
for (i in 1:length(non.zero.weights))
{
  temp.text <- strsplit(non.zero.weights[i],"\\["][1][2]
  temp.text <- strsplit(temp.text,",")
  this.gene <- as.numeric(temp.text[[1]][1])
  this.NR <- as.numeric(strsplit(temp.text[[1]][2],"\\")[[1]][1])
  non.zero.gene[i] <- this.gene
  non.zero.NR[i] <- this.NR
  NR.Gene.Network.data[this.gene,this.NR] <- NA
}
rownames(NR.Gene.Network.data) <- NR.genes
```

Supplementary Material for “High-Throughput Toxicogenomic Screening of Chemicals in the Environment Using Metabolically Competent Hepatic Cell Cultures”

```
colnames(NR.Gene.Network.data) <- NRs

for (this.subset in 1:DIVIDE.DATA)
{
# Subset down to roughly a tenth of the chemicals (subsampled at random):
these.chems <- Chem.Names[which.sample==this.subset]
# Calculate the number of chems in this subset:
this.num.chems <- length(these.chems)
# Only look at the hepdata for these chems:
this.hepdata.subset <- subset(hepdata,casn %in% these.chems)
# Need to reassign the chem id's:
this.hepdata.subset$chem.id <- sapply(this.hepdata.subset$casn,function(x) which(x==these.chems))
# Need to reflect the size of the data subset:
this.num.obs <- dim(this.hepdata.subset)[1]

indices <- sample(1:dim(out.mcmc)[1],NUM.CHAINS)
inits <- list()
# We need to set an initial value for each AC50
# The sample has trouble finding the posterior given ~6000 AC50s, so we need to
# try to get close:
NR.AC50.index0 <- matrix(NA,this.num.chems,Num.NR,dimnames=list(these.chems,NRs))
for (this.chem in these.chems)
{
NR.AC50.index0[this.chem,1:Num.NR] <- max(which(NR.Chem.Prior[this.chem,]==1),na.rm=T)
}
for (chain in 1:NUM.CHAINS)
{
NR.Gene.Network <- matrix(NA,nrow=Num.Genes,ncol=Num.NR)
P2min <- rep(NA,Num.Genes)
names(P2min) <- NR.genes
P3min <- P2min
rownames(NR.Gene.Network) <- NR.genes
colnames(NR.Gene.Network) <- NRs
for (this.gene in NR.genes)
{
P2min[this.gene]<-out.mcmc[indices[chain],paste("P2min[" ,which(NR.genes==this.gene),"]",sep="")]
P3min[this.gene]<-out.mcmc[indices[chain],paste("P3min[" ,which(NR.genes==this.gene),"]",sep="")]
for (this.NR in NRs)
if (is.na(NR.Gene.Network.data[this.gene,this.NR]))
{
NR.Gene.Network[this.gene,this.NR] <-
out.mcmc[indices[chain],paste("NR.Gene.Network[" ,which(NR.genes==this.gene),"]",which(NRs==this.NR),"]",sep="")]
}
}
NR.Network <- rep(NA,length(non.zero.gene)+2*Num.Genes)
for (i in 1:Num.Genes)
{
```

Supplementary Material for “High-Throughput Toxicogenomic Screening of Chemicals in the Environment Using Metabolically Competent Hepatic Cell Cultures”

```

NR.Network[i] <- P2min[i]
NR.Network[Num.Genes+i] <- P3min[i]
}
for (i in 1:length(non.zero.gene))
{
  NR.Network[2*Num.Genes+i] <- NR.Gene.Network[non.zero.gene[i],non.zero.NR[i]]
}
P.multi <- P.multi.mu
NR.Network.0 <- rep(0,length(non.zero.gene))
NR.AC50.index <- NR.AC50.index0
for (this.NR in NRs)
{
# For each NR, pick only the genes that are relevant
  these.genes <- NR.genes[abs(NR.Gene.Network[,this.NR])>0.5]
# Subset the data to those chemicals that showed activity in genes relevant to NR:
  this.hepdata <- subset(this.hepdata.subset, gene%in%these.genes&state!=1)
# For each chem with activity, chose on of the ten lowest conc's with activity:
  for (this.chem in unique(this.hepdata$casn))
  {
    possible <- subset(this.hepdata,casn==this.chem)$conc.id
    if (length(possible) >10) possible <- sort(possible)[1:10]
    NR.AC50.index[this.chem,this.NR] <-
  }
}
which(Chem.Possible.AC50s==Concs.Tested[this.chem,sample(possible,1)])
}
}
inits[[paste("inits",chain,sep="")] <- list(
  .RNG.seed=as.numeric(paste(rep(chain,6),sep="",collapse="")),
  .RNG.name="base::Super-Duper",
  NR.Network.0=NR.Network.0,
  P.multi=P.multi,
  NR.AC50.index=matrix(NR.AC50.index,nrow=this.num.chems,ncol=Num.NR)
)
}

jags.data <- list('Obs.State' = this.hepdata.subset[,"state"],
  'Num.Obs' = this.num.obs,
  'Num.Genes' = Num.Genes,
  'Num.Concs' = Num.Concs[these.chems],
  'Num.Chems' = this.num.chems,
  'NR.Chem.Prior' = NR.Chem.Prior[these.chems,],
  'Chem.Possible.AC50s' = Chem.Possible.AC50s,
  'Num.NR' = Num.NR,
  'NR.cat.boolean' = NR.cat.boolean,
  'Concs.Tested' = as.matrix(Concs.Tested[these.chems,],num.rows=this.num.chems),
  'Obs.Chem' = this.hepdata.subset[,"chem.id"],
  'Obs.Conc' = this.hepdata.subset[,"conc.id"],
  'Obs.Gene' = this.hepdata.subset[,"gene.id"],
  'P.multi.mu'=P.multi.mu,

```

Supplementary Material for “High-Throughput Toxicogenomic Screening of Chemicals in the Environment Using Metabolically Competent Hepatic Cell Cultures”

```
'P.multi.omega'=P.multi.omega,  
'NR.network.prior.mu' = NR.Gene.Network.mu,  
'NR.network.prior.omega' = NR.Gene.Network.omega,  
'NR.Gene.Network'= NR.Gene.Network.data,  
'non.zero.gene' = non.zero.gene,  
'non.zero.NR' = non.zero.NR,  
'Num.non.zero.weights' = length(non.zero.gene)  
)
```

```
save(inits,which.subset,these.chems,this.subset,jags.data,RJAGS.MODEL.FILE,NUM.CHAINS,NR.genes,Chem.Names,file=paste(FILENAME,"-PREJAGS-",this.subset,"-",Sys.Date(),".RData",sep=""))
```

```
cat(paste("\n\nBeginning a Bayesian run with ",jags.data$Num.Obs," observations of gene expression for ",jags.data$Num.Chems," chemicals.\n\nInferring an interaction matrix of ",jags.data$Num.Genes," genes driven by ",jags.data$Num.NR," nuclear receptors.\n\n",sep=""))
```

```
coda.out[[this.subset]] <- autorun.jags(RJAGS.MODEL.FILE,  
  n.chains = NUM.CHAINS,  
  method="parallel",  
  method.options=list(cl=cl2),  
  # summarise=T,  
  inits = inits,  
  # max.time="4h",  
  startsample=4000,  
  adapt=4000,  
  startburnin=10000,  
  # thin.sample=T,  
  psrf.target = 1.2,  
  data = jags.data,  
  jags = JAGS.PATH,  
  monitor = c('NR.Network'))
```

```
save(coda.out,NR.genes,Chem.Names,Num.Chems,Num.Genes,Num.NR,NRs,FILENAME,file=paste(FILENAME,"-",Sys.Date(),"-1.RData",sep=""))
```

```
coda.out [[this.subset]] <-extend.jags(coda.out[[this.subset]],  
  add.monitor = c('NR.AC50.index'))
```

```
save(coda.out,NR.genes,Chem.Names,Num.Chems,Num.Genes,Num.NR,NRs,FILENAME,file=paste(FILENAME,"-",Sys.Date(),"-2.RData",sep=""))  
}
```

```
stopCluster(cl2)
```

```
# Get rid of anything in the workspace:  
rm(list=ls())
```



```
load-hepdata-121117.R
```

```
library(data.table)
```

```
library(tcpl)
```

```
library(reshape2)
```

```
if (file.exists(paste(FILENAME, "-hepdata.RData", sep=""))) {
```

```
{
```

```
  load(paste(FILENAME, "-hepdata.RData", sep=""))
```

```
} else {
```

```
cat("Retrieving chemical concentrations from invitroDB...\n")
```

```
### _____ READ from in vitro DB
```

```
tcplConf(drvr = "MySQL",
```

```
  user = "_dataminer",
```

```
  pass = "pass",
```

```
  host = "134.67.216.183",
```

```
  db = "invitrodb"
```

```
#   int = TRUE
```

```
)
```

```
tcplLoadAsid()
```

```
aids <- tcplLoadAeid(fld = "asid", val = 9)$aeid
```

```
dat <- tcplPrepOtppt(tcplLoadData(lvl=4L, fld = "aeid", val = aids))
```

```
### _____
```

```
HepaRG.all <- data.table(dat)
```

```
### _____
```

```
# The reference plate chemicals don't have casn, pull that from the chem prior table"
```

```
HepaRG.all[HepaRG.all$spid=="Omeprazole", "casn"] <- "73590-58-6"
```

```
HepaRG.all[HepaRG.all$spid=="Rifampicin", "casn"] <- "13292-46-1"
```

```
HepaRG.all[HepaRG.all$spid=="Fenofibric Acid", "casn"] <- "42017-89-0"
```

```
HepaRG.all[HepaRG.all$spid=="Aflatoxin B1", "casn"] <- "1162-65-8"
```

```
HepaRG.all[HepaRG.all$spid=="Chenodeoxycholic", "casn"] <- "474-25-9"
```

```
HepaRG.all[HepaRG.all$spid=="Chenodeoxycholic Acid", "casn"] <- "474-25-9"
```

```
HepaRG.all[HepaRG.all$spid=="Phenobarbital", "casn"] <- "57-30-7"
```

```
# The reference plate chemicals don't have chnm, pull that from the chem prior table"
```

```
HepaRG.all[HepaRG.all$spid=="Omeprazole", "chnm"] <- "Omeprazole"
```

```
HepaRG.all[HepaRG.all$spid=="Rifampicin", "chnm"] <- "Rifampicin"
```

```
HepaRG.all[HepaRG.all$spid=="Fenofibric Acid", "chnm"] <- "Fenofibric Acid"
```

```
HepaRG.all[HepaRG.all$spid=="Aflatoxin B1", "chnm"] <- "Aflatoxin B1"
```

```
HepaRG.all[HepaRG.all$spid=="Chenodeoxycholic", "chnm"] <- "Chenodeoxycholic acid"
```

```
HepaRG.all[HepaRG.all$spid=="Chenodeoxycholic Acid", "chnm"] <- "Chenodeoxycholic acid"
```

```
HepaRG.all[HepaRG.all$spid=="Phenobarbital", "chnm"] <- "Phenobarbital sodium"
```

```
### _____ READ THE Lvl5&6 File (these are the hits only)
```



Supplementary Material for “High-Throughput Toxicogenomic Screening of Chemicals in the Environment Using Metabolically Competent Hepatic Cell Cultures”

```
#HepaRG <-
read.csv("L:/Lab/NCCT_ToxCast/HepaRG/tcpl_analysis/LTEA_tcpl_1.0_June/LTEA_Level5&6_20150602.c
sv",header=T,sep="," ,stringsAsFactors=F,quote="\")

cat(paste("Retrieving curve fits from",HEPARG.table,"...\n"))
HepaRG <-read.csv(HEPARG.table,header=T,sep="," ,stringsAsFactors=F,quote="\")

#Get rid of ToxCast phenobarb for now:
#HepaRG.all <- subset(HepaRG.all,spid!="TX006463")
#HepaRG <- subset(HepaRG,spid!="TX006463")
#HepaRG.all <- subset(HepaRG.all,spid!="TP0000981H07")
#HepaRG <- subset(HepaRG,spid!="TP0000981H07")

# Extract the gene names from the assay name:
HepaRG$gene <- lapply(strsplit(HepaRG$aenm,"_"),function(x) x[3])

# The reference plate chemicals don't have casn, pull that from the chem prior table"
HepaRG[HepaRG$spid=="Omeprazole","casn"] <- "73590-58-6"
HepaRG[HepaRG$spid=="Rifampicin","casn"] <- "13292-46-1"
HepaRG[HepaRG$spid=="Fenofibric Acid","casn"] <- "42017-89-0"
HepaRG[HepaRG$spid=="Aflatoxin B1","casn"] <- "1162-65-8"
HepaRG[HepaRG$spid=="Chenodeoxycholic","casn"] <- "474-25-9"
HepaRG[HepaRG$spid=="Chenodeoxycholic Acid","casn"] <- "474-25-9"
HepaRG[HepaRG$spid=="Phenobarbital","casn"] <- "57-30-7"

# The reference plate chemicals don't have chnm, pull that from the chem prior table"
HepaRG[HepaRG$spid=="Omeprazole","chnm"] <- "Omeprazole"
HepaRG[HepaRG$spid=="Rifampicin","chnm"] <- "Rifampicin"
HepaRG[HepaRG$spid=="Fenofibric Acid","chnm"] <- "Fenofibric Acid"
HepaRG[HepaRG$spid=="Aflatoxin B1","chnm"] <- "Aflatoxin B1"
HepaRG[HepaRG$spid=="Chenodeoxycholic","chnm"] <- "Chenodeoxycholic acid"
HepaRG[HepaRG$spid=="Chenodeoxycholic Acid","chnm"] <- "Chenodeoxycholic acid"
HepaRG[HepaRG$spid=="Phenobarbital","chnm"] <- "Phenobarbital sodium"

if (any(is.na(HepaRG$casn))) stop("Problem with casn in HepaRG data")

# Similarly, the reference plate chemicals don't have a chnm:
HepaRG[is.na(HepaRG$chnm),"chnm"] <- HepaRG[is.na(HepaRG$chnm),"spid"]

# This is a big file, so lets get rid of any genes that don't have ref chem activity:
# We want to get rid of any genes that don't show activity for the reference chemicals:
NR.genes <- sort(unlist(unique(subset(HepaRG,casn%in%Ref.chems&hitc==1)$gene)))
NR.genes <- NR.genes[!NR.genes=="LDH"] #For another day -- add "cytotox receptor" with strong prior on
CR-LDH connection
```

Supplementary Material for “High-Throughput Toxicogenomic Screening of Chemicals in the Environment Using Metabolically Competent Hepatic Cell Cultures”

```
if (RESTRICT.TO.SIGNIFICANT.GENES)
{
  load(SIGNIF.GENES)
  NR.genes <- NR.genes[NR.genes%in%signif.genes]
}
Num.Genes <- length(NR.genes)

HepaRG <- subset(HepaRG, gene %in% NR.genes)

# Now let's subset the data down to only the reference chemicals or the ToxCast library:
if (REFERENCE.CHEMS)
{
  hepdata <- subset(HepaRG,casn %in% Ref.chems)
} else {
  hepdata <- subset(HepaRG,! (casn %in% Ref.chems))
}

# Further subsetting to make sure that we have only the hits:
hepdata <-subset(hepdata,hitc==1)
hepdata<- subset(hepdata,regexr("Hit-call potentially confounded by overfitting",hepdata$flag)==-1|is.na(hepdata$flag))
hepdata<- subset(hepdata,regexr("Borderline active",hepdata$flag)==-1|is.na(hepdata$flag))
hepdata<- subset(hepdata,regexr("Only one conc above baseline, active",hepdata$flag)==-1|is.na(hepdata$flag))

# Now pull only the columns that we will use:
hepdata <- hepdata[,c('spid','casn','hill_ga','aeid','aenm','gene')]
# A state of "3" means down-regulation:
hepdata$state <- 3
# Set the upregulation assays to state "2":
hepdata[regexr("_up",hepdata$aenm)!=-1,"state"] <- 2

# Now we store the remaining chemicals in a vector:
Chem.Names <- unique(hepdata[, "casn"])
# And count the number of chemicals:
Num.Chems <- length(Chem.Names)
# It's useful to have the names instead of the CAS numbers as well:
Chem.Full.Names <- Chem.Names
for (i in 1:length(Chem.Names))
  Chem.Full.Names[i] <- HepaRG[HepaRG$casn==Chem.Names[i], "chnm"][1]

# Make a list of the concentrations tested for each chemical (eventually want
# a matrix but we don't know how big of a matrix yet):
Concs.Tested <- NULL
# The table hep.data.conc stores a row for each observation.
# We initialize the table to have an observation of 1 (unchanged) for every gene
# and every concentration:
cat("Building hep.data.conc.list...\n")
```

Supplementary Material for “High-Throughput Toxicogenomic Screening of Chemicals in the Environment Using Metabolically Competent Hepatic Cell Cultures”

```

hep.data.conc.list <- NULL
row.count <- 0
for (this.cas in Chem.Names)
{
  if (!REFERENCE.CHEMS) if (!(which(Chem.Names==this.cas)%round(length(Chem.Names)/100)))
  cat(paste(round(which(Chem.Names==this.cas)/length(Chem.Names)*100,1),"%\n",sep=""))
  for (this.gene in NR.genes)
  {
    # HepaRG.all contains a full list of the LTEA data pulled in from the
    # invitroDB. It provides concentration information, and may contain assays that
    # are "hits" in the DB but we have thrown out. We want to create a set of
    # observations for every time the assay was run.
    # In invitro db the up and down modes are treated as two different assays,
    # but for our observations we lump them together.
    assays <- c(paste("LTEA_HepaRG_",this.gene,"_dn",sep=""),paste("LTEA_HepaRG_",this.gene,"_up",sep=""))
    this.all.samples.data <- as.data.frame(subset(HepaRG.all,casn==this.cas &
    aenm%in%assays))[c("spid", "aenm", "nconc", "logc_min", "logc_max", "hill_ga")]

    # If the assay wasn't run, don't generate data for it:
    if (dim(this.all.samples.data)[1]>0)
    {
      if (dim(this.all.samples.data)[1]>1)
      {
        keep.these.rows <- rep(T,dim(this.all.samples.data)[1])
        for (this.row in seq(1,length(keep.these.rows),2))
        {
          # If there is no activity we keep an arbitrary assay (the first of the two):
          if (all(is.na(this.all.samples.data[this.row:(this.row+1),"hill_ga"]))) keep.these.rows[this.row]<- F
          else
          {
            if (is.na(this.all.samples.data[this.row,"hill_ga"])) keep.these.rows[this.row] <- F
            else if (is.na(this.all.samples.data[this.row+1,"hill_ga"])) keep.these.rows[this.row+1] <- F
            else {
              # We don't do non-monotonic responses here (assuming cytotoxicity is the cause),
              # so just take the lower of the two activities (if there is more than one):
              if (this.all.samples.data[this.row,"hill_ga"] ==
              min(this.all.samples.data[this.row:(this.row+1),"hill_ga"],na.rm=T)) keep.these.rows[this.row+1] <- F
              else keep.these.rows[this.row] <- F
            }
          }
        }
      }
    }
    # Keep just the rows we want:
    this.all.samples.data <- this.all.samples.data[keep.these.rows,]
  }
  # Hepdata contains the scrubbed list of hits from Jill, with certain hits
  # removed because of flags. I read this in from a CSV file.
  # This will be empty if there is no hit for this chemical-gene pair:

```

```
this.hit.data <- subset(hepdata,casn==this.cas & gene==this.gene)

# Loop over repeated assays:
for (this.row in 1:dim(this.all.samples.data)[1])
{
  num.conc <- this.all.samples.data[this.row,"nconc"]
  min.conc <- this.all.samples.data[this.row,"logc_min"]
  max.conc <- this.all.samples.data[this.row,"logc_max"]
  ac50 <- this.all.samples.data[this.row,"hill_ga"]

  row.count <- row.count+num.conc
  these.rows <- data.frame(
    casn=rep(this.cas,num.conc),
    gene=this.gene,
    state=1,
    conc=seq(min.conc,max.conc,(max.conc-min.conc)/(num.conc-1)),
    stringsAsFactors=F)

# If the data isn't in hit data presume a no hit (all 1's)
if (ac50 %in% this.hit.data[, "hill_ga"])
{
  this.state <- this.hit.data[this.hit.data[, "hill_ga"]==ac50, "state"]
  these.rows[these.rows$conc > ac50, "state"] <- this.state
}
these.rows$conc <- round(these.rows$conc,1)
hep.data.conc.list[[length(hep.data.conc.list)+1]] <- these.rows
Concs.Tested[[this.cas]] <- sort(unique(c(Concs.Tested[[this.cas]],these.rows$conc)))
}
}
}

# Further subsetting to make sure we have concentration data:
hepdata <-subset(hepdata,casn%in%names(Concs.Tested))
# Now we store the remaining chemicals in a vector:
Chem.Names <- unique(hepdata[, "casn"])
# And count the number of chemicals:
Num.Chems <- length(Chem.Names)
# It's useful to have the names instead of the CAS numbers as well:
Chem.Full.Names <- Chem.Names
for (i in 1:length(Chem.Names))
  Chem.Full.Names[i] <- HepaRG[HepaRG$casn==Chem.Names[i], "chnm"][1]

cat("Converting hep.data.conc.list into dataframe...\n")
hep.data.conc <- data.frame(
  casn=rep("temp",row.count),
  gene=rep("temp",row.count),
  state=rep(1,row.count),
```

Supplementary Material for “High-Throughput Toxicogenomic Screening of Chemicals in the Environment Using Metabolically Competent Hepatic Cell Cultures”

```
      conc=rep(-99,row.count),stringsAsFactors=F)
this.row <- 1
this.index <- 1
while (this.index <= length(hep.data.conc.list))
{
  if      (!REFERENCE.CHEMS)      if      (!(this.index%%round(length(hep.data.conc.list)/100)))
cat(paste(round(this.index/length(hep.data.conc.list)*100,1),"%\n",sep=""))
  data.points <- dim(hep.data.conc.list[[this.index]])[1]
  hep.data.conc[this.row:(this.row+data.points-1),] <- hep.data.conc.list[[this.index]]
  this.row <- this.row+data.points
  this.index <- this.index+1
}

# We overwrite the temporary (hits only) hepdata table with the table containing
# data for each concentration:

hepdata <- hep.data.conc

source("plot.data-062915.R")
plot.data(hepdata,NR.genes,Chem.Names,Chem.Full.Names,file.stub=paste(FILENAME,"-Simplified-
LTEA-Data-",sep=""))

# For each observation we need id's to tell JAGS what gene, chemical, and concentration the observation
refers to:
hepdata$gene.id <- sapply(hepdata$gene,function(x) which(x==NR.genes))
hepdata$chem.id <- sapply(hepdata$casn,function(x) which(x==Chem.Names))

# Now we know how many observations in total we have:
Num.Obs <- dim(hepdata)[1]

# We want to be able to identify the concentration for each observation:
max.concs <- max(unlist(lapply(Concs.Tested,length)))
Concs.matrix <- matrix(NA,nrow=Num.Chems,ncol=max.concs)
Num.Concs <- rep(0,Num.Chems)
rownames(Concs.matrix) <- Chem.Names
names(Num.Concs) <- Chem.Names
for (this.cas in Chem.Names)
{
  Num.Concs[this.cas] <- length(Concs.Tested[[this.cas]])
  Concs.matrix[this.cas,1:Num.Concs[this.cas]]<-Concs.Tested[[this.cas]]
  hepdata[hepdata$casn==this.cas,"conc.id"]                                     <-
sapply(hepdata[hepdata$casn==this.cas,"conc"],function(x) which(x==Concs.Tested[[this.cas]]))
}

Concs.Tested <- Concs.matrix

rm("dat","Concs.matrix","hep.data.conc","hep.data.conc.list","HepaRG","HepaRG.all","HEPARG.table")
```

Supplementary Material for “High-Throughput Toxicogenomic Screening of Chemicals in the Environment Using Metabolically Competent Hepatic Cell Cultures”

```
#save(hepdata,max.conc,file=paste(FILENAME,"-simplifieddata-",Sys.Date(),".RData",sep=""))  
save.image(file=paste(FILENAME,"-hepdata.RData",sep=""))  
}
```

analyze-step1-112917.R

```
rm(list=ls())
```

```
load("HepaRG-Ref-Step1-Jul17-2017-11-17.RData")
#1:
load("HepaRG-Ref-Step1-Jul17-AHR-2017-08-25.RData")
outlist[[1]] <- list(genelist=genelist,coda.out=coda.out)
#2:
load("HepaRG-Ref-Step1-Jul17-AR-2017-08-25.RData")
outlist[[2]] <- list(genelist=genelist,coda.out=coda.out)
#3:
#load("HepaRG-Ref-Step1-Jul17-CAR-2017-11-17.RData")
#4:
load("HepaRG-Ref-Step1-Jul17-FXR-2017-08-25.RData")
outlist[[4]] <- list(genelist=genelist,coda.out=coda.out)
#5:
load("HepaRG-Ref-Step1-Jul17-PPARA-2017-08-25.RData")
outlist[[5]] <- list(genelist=genelist,coda.out=coda.out)
#6:
load("HepaRG-Ref-Step1-Jul17-PXR-2017-08-26.RData")
outlist[[6]] <- list(genelist=genelist,coda.out=coda.out)
```

```
signif.genes <- NULL
step1.NR.weight.low <- NULL
for (i in 1:length(NRs))
{
  genelist <- outlist[[i]][[1]]
  step1.NR.weight.low <- rbind(step1.NR.weight.low,NA)
  M <- dim(step1.NR.weight.low)[1]
  rownames(step1.NR.weight.low)[M] <- NRs[i]
  new.genes <- genelist[!(genelist %in% colnames(step1.NR.weight.low))]
  L <- length(new.genes)
  if (L>0)
  {
    for (j in 1:length(new.genes))
    {
      step1.NR.weight.low <- cbind(step1.NR.weight.low,NA)
      colnames(step1.NR.weight.low)[dim(step1.NR.weight.low)[2]] <- new.genes[j]
    }
  }
}
step1.NR.weight.high <- step1.NR.weight.low
step1.NR.weight.med <- step1.NR.weight.low
```

Supplementary Material for “High-Throughput Toxicogenomic Screening of Chemicals in the Environment Using Metabolically Competent Hepatic Cell Cultures”

```

for (i in 1:length(NRs))
{
  out.mcmc <- as.matrix(outlist[[i]][[2]]$mcmc[[1]])
  for (j in 2:length(outlist[[i]][[2]]$mcmc)) out.mcmc <-
  rbind(out.mcmc,as.matrix(outlist[[i]][[2]]$mcmc[[j]]))
  # means <- apply(out.mcmc[,regexpr("NR.Gene.Net",colnames(out.mcmc))!=-1
  &regexpr(",2",colnames(out.mcmc))=-1],2,mean)
  low <- apply(out.mcmc[,regexpr("NR.Gene.Net",colnames(out.mcmc))!=-1
  &regexpr(",2",colnames(out.mcmc))=-1],2,function(x) quantile(x,probs=0.25))
  med <- apply(out.mcmc[,regexpr("NR.Gene.Net",colnames(out.mcmc))!=-1
  &regexpr(",2",colnames(out.mcmc))=-1],2,function(x) quantile(x,probs=0.5))
  high <- apply(out.mcmc[,regexpr("NR.Gene.Net",colnames(out.mcmc))!=-1
  &regexpr(",2",colnames(out.mcmc))=-1],2,function(x) quantile(x,probs=0.75))

  #gene.weights <- means[regexpr("NR.Gene.Net",names(means))!=-1 &regexpr(",2",names(means))=-
  1]
  genelist <- outlist[[i]][[1]]
  for (j in 1:length(genelist))
  {
    step1.NR.weight.low[NRs[i],genelist[j]] <- low[j]
    step1.NR.weight.med[NRs[i],genelist[j]] <- med[j]
    step1.NR.weight.high[NRs[i],genelist[j]] <- high[j]
  }
  # names(gene.weights) <- genelist

  #out.mcmc[,regexpr("sum",colnames(out.mcmc))!=-1][,1:10]
  #out.mcmc[,regexpr("PW",colnames(out.mcmc))!=-1][,1:10]
  #out.mcmc[,regexpr("P2\\[1,",colnames(out.mcmc))!=-1]
  #out.mcmc[,regexpr("P3\\[1,",colnames(out.mcmc))!=-1]
  #out.mcmc[,regexpr("NR.Gene",colnames(out.mcmc))!=-1&regexpr(",2",colnames(out.mcmc))!=-1]
}

#signif.genes <- sort(colnames(NR.weight.low)[apply(NR.weight.med,2,function(x)
any(abs(x)>0.2,na.rm=T))])
#signif.genes <- sort(colnames(step1.NR.weight.med)[apply(t(apply(step1.NR.weight.med,1,function(x)
x/max(abs(x),na.rm=T)))>0.1,2,function(x) any(x,na.rm=T))])

# 95% confident non-zero:
signif.genes <- sort(colnames(step1.NR.weight.high)[apply(step1.NR.weight.high<0
&step1.NR.weight.low<0,2,function(x) any(x,na.rm=T))])
signif.genes <- sort(unique(c(signif.genes,
colnames(step1.NR.weight.high)[apply(step1.NR.weight.high>0 &step1.NR.weight.low>0,2,function(x)
any(x,na.rm=T))]))))

```



Supplementary Material for “High-Throughput Toxicogenomic Screening of Chemicals in the Environment Using Metabolically Competent Hepatic Cell Cultures”

```
step1.NR.weight.low <- NR.weight.low[,signif.genes]  
step1.NR.weight.med <- NR.weight.med[,signif.genes]  
step1.NR.weight.high <- NR.weight.high[,signif.genes]
```

```
save(signif.genes,step1.NR.weight.low,step1.NR.weight.med,step1.NR.weight.high,file=paste(FILENAME  
,"-signifgenes-",Sys.Date(),".RData",sep=""))
```

build-posterior-network-043018.r

library(igraph)

```
Network.Up <- matrix(0,nrow=Num.Genes,ncol=Num.NR)
rownames(Network.Up) <- NR.genes
colnames(Network.Up) <- NRs
Network.Down <- Network.Up
for (i in 1:length(jags.data$non.zero.gene))
{
  this.gene <- jags.data$non.zero.gene[i]
  this.nr <- jags.data$non.zero.NR[i]
  this.weight <- median(out.mcmc[,paste("NR.Network[",i,"]",sep="")])
  if (this.weight > 0)
  {
    Network.Up[this.gene,this.nr] <- this.weight
  } else {
    Network.Down[this.gene,this.nr] <- -this.weight
  }
}
```

Supplementary Material for “High-Throughput Toxicogenomic Screening of Chemicals in the Environment Using Metabolically Competent Hepatic Cell Cultures”

create.model-042018.r

```
create.ref.model <- function(filename,Num.NR)
{
  cat("#-----
# Name:      ",filename,"
# Description: A JAGS model for drawing inference of Nuclear Receptor (NR)
#           activation from gene expression data
#
# Author:    John Wambaugh, based on code by Robert Pearce
#
# Created:   ",date(),"
#-----

model {

  for (i in 1:Num.Chems) {
    for (j in 1:Num.NR) {
      NR.AC50.index[i,j] ~ dcat(NR.Chem.Prior[i,,j])
      NR.AC50[i,j] <- Chem.Possible.AC50s[i,NR.AC50.index[i,j]]
    }
  }

  for (i in 1:Num.Chems) {
    for (j in 1:Num.Concs[i]) {
      NR.state[i,j] <- 1",file=filename,sep=""")
      for (i in 1:Num.NR) cat(" + ",2^(Num.NR-i),"*step(Concs.Tested[i,j]-
NR.AC50[i,",as.integer(i),"])",file=filename,append=T,sep=""")
      cat("\n }
    }

    # From mclark:
    # Half-cauchy as in Gelman 2006
    # If scale parameter in cauchy is 5, precision of z = 1/5^2 = 0.04
    # sigma int
    # sd_int <- zInt/sqrt(chSqInt) # prior for sigma; cauchy = normal/sqrt(chi^2)
    # zInt ~ dnorm(0, .04)|I(0,)
    # chSqInt ~ dgamma(0.5, 0.5) # chi^2 with 1 d.f.
    # Carvalho Horseshoe prior as coded by Allen Riddell:
    tau ~ dt(0, 1, 1)T(0,)

    for (i in 1:Num.Genes) {
      for (j in 1:Num.NR) {
        lambda[i,j] ~ dt(0, 1, 1)T(0,)
        NR.Gene.Network[i,j] ~ dnorm(0,lambda[i,j] * tau)T(-50,50)
      }
    }

    Lit.Threshold ~ dunif(0,50)
  }
}
```

Supplementary Material for “High-Throughput Toxicogenomic Screening of Chemicals in the Environment Using Metabolically Competent Hepatic Cell Cultures”

```
log.Lit.Obs.Precision ~ dunif(-7,1)
Lit.Obs.Precision <- 10^log.Lit.Obs.Precision
for (i in 1:Num.Lit.Obs) {
  Lit.Obs[i] ~ dnorm(abs(NR.Gene.Network[Lit.Obs.Gene[i],Lit.Obs.NR[i]]),Lit.Obs.Precision)
  is.Signif.Lit.Obs[i] ~ dinterval(Lit.Obs[i],Lit.Threshold)
}

for (i in 1:Num.Genes)
{
  P2min[i] ~ dunif(0.0001,0.5)
  P3min[i] ~ dunif(0.0001,0.5)
}

",file=filename,append=T)
if (Num.NR > 1) cat("Network.Response <- NR.Gene.Network %*%
NR.cat.boolean",file=filename,append=T)
else cat("Network.Response[,2] <- NR.Gene.Network",file=filename,append=T)
cat("\n
P2 <- (Network.Response+abs(Network.Response))/2
P3 <- (abs(Network.Response)-Network.Response)/2

# We have three behaviors we want to ensure:
# 1) P2 and P3 are always non-zero (assay noise or stimulus by other receptors
# not modeled)
# 2) P1 does not go to zero when many NR's are active (assay noise again)
# 3) The stiffness of P1 -- is it switch like (immediately drops for any NR
# activation) or more gradual?

# We also want to weight the data for the replicate plates, without having to
# replicate the data. Need to do a weird fix to the dcat distribution to do this.
# Basically, the density d for n replicates is d^n. In order to achieve this with
# a categorical distribution, we need a fourth category that soaks up the remaining
# probability, otherwise our correctin will get messed up when dcat renormalizes
# everything.

for (i in 1:Num.Obs)
{
  PW[i,1] <- 1 - P2min[Obs.Gene[i]] - P3min[Obs.Gene[i]]
  PW[i,2] <- P2min[Obs.Gene[i]]+P2[Obs.Gene[i],NR.state[Obs.Chem[i],Obs.Conc[i]]]
  PW[i,3] <- P3min[Obs.Gene[i]]+P3[Obs.Gene[i],NR.state[Obs.Chem[i],Obs.Conc[i]]]
  Obs.State[i] ~ dcat(PW[i,])
}
}",file=filename,append=T)
}

create.toxcast.model <- function(filename,Num.NR)
{
```

Supplementary Material for “High-Throughput Toxicogenomic Screening of Chemicals in the Environment Using Metabolically Competent Hepatic Cell Cultures”

```

cat("#-----
# Name:    ",filename,"
# Description: A JAGS model for drawing inference of Nuclear Receptor (NR)
#           activation from gene expression data
#
# Author:   John Wambaugh, based on code by Robert Pearce
#
# Created:  ",date(),"
#-----

model {
  for (i in 1:Num.Chems) {
    for (j in 1:Num.NR) {
      NR.AC50.index[i,j] ~ dcat(NR.Chem.Prior[i,])
    }
  }

  for (i in 1:Num.Chems) {
    for (j in 1:Num.Concs[i]) {
      NR.state[i,j] <- 1",file=filename,sep=""
      for (i in 1:Num.NR) cat("    +    ",2^(Num.NR-i),"*step(Concs.Tested[i,j]-
Chem.Possible.AC50s[NR.AC50.index[i,as.integer(i),"])",file=filename,append=T,sep=""
      cat("\n  }
    }

  P.multi ~ dmnorm(P.multi.mu,P.multi.omega)

  # Read in the P2 and P3 min from the multivariate normal:
  for (i in 1:Num.Genes)
  {
  # Multivariate normal distribution doesn't allow truncation:
  P2min[i] <- max(0.0001,min(0.5,P.multi[i]))
  P3min[i] <- max(0.0001,min(0.5,P.multi[Num.Genes+i]))
  }

  NR.Network.0 ~ dmnorm(rep(0,length(NR.network.prior.mu)),NR.network.prior.omega)
  NR.Network <- NR.network.prior.mu+NR.Network.0**NR.network.prior.mu

  # Read in the non-zero weights from the multivariate normal:
  for (i in 1:Num.non.zero.weights)
  {
  NR.Gene.Network[non.zero.gene[i],non.zero.NR[i]] <- NR.Network[i]
  }

  Network.Response <- NR.Gene.Network ** NR.cat.boolean
  P2 <- (Network.Response+abs(Network.Response))/2
  P3 <- (abs(Network.Response)-Network.Response)/2

```

Supplementary Material for “High-Throughput Toxicogenomic Screening of Chemicals in the Environment Using Metabolically Competent Hepatic Cell Cultures”

# We have three behaviors we want to ensure:

# 1) P2 and P3 are always non-zero (assay noise or stimulus by other receptors

# not modeled)

# 2) P1 does not go to zero when many NR's are active (assay noise again)

# 3) The stiffness of P1 -- is it switch like (immediately drops for any NR

# activation) or more gradual?

# We also want to weight the data for the replicate plates, without having to

# replicate the data. Need to do a weird fix to the dcat distribution to do this.

# Basically, the density  $d$  for  $n$  replicates is  $d^n$ . In order to achieve this with

# a categorical distribution, we need a fourth category that soaks up the remaining

# probability, otherwise our correctin will get messed up when dcat renormalizes

# everything.

```
for (i in 1:Num.Genes)
{
  for (j in 1:"2^Num.NR,")
  {
    PW[i,j,1] <- 1 - P2min[i] - P3min[i]
    PW[i,j,2] <- P2min[i]+P2[i,j]
    PW[i,j,3] <- P3min[i]+P3[i,j]
  }
}

for (i in 1:Num.Obs)
{
  Obs.State[i] ~ dcat(PW[Obs.Gene[i],NR.state[Obs.Chem[i],Obs.Conc[i]],])
}

}\n",file=filename,append=T)
}
```

Supplementary Material for “High-Throughput Toxicogenomic Screening of Chemicals in the Environment Using Metabolically Competent Hepatic Cell Cultures”

[create-NR-prior-tables-033116.R](#)

```
# We use this table as an argument to the function that builds the JAGS model:
NR.Chem.Prior.Mean <- array(NA,dim=c(Num.Chems,Num.NR))
rownames(NR.Chem.Prior.Mean) <- Chem.Names
colnames(NR.Chem.Prior.Mean) <- NRs
NR.Chem.Prior.SD <- NR.Chem.Prior.Mean
NR.Chem.Prior.Prec <- NR.Chem.Prior.Mean
for (this.row in 1:dim(NR.chem.prior)[1])
{
  this.cas <- NR.chem.prior[this.row,"CAS"]
  this.ac50 <- NR.chem.prior[this.row,"AC50"]
  this.nr <- toupper(NR.chem.prior[this.row,"NR"])
  if (!this.nr %in% toupper(NRs)) stop(paste(this.nr,"from Reference Chemicals worksheet not found on
Genes worksheet"))
  if (!(this.cas %in% rownames(NR.Chem.Prior.Mean))) warning(paste(this.cas,"from Reference Chemicals
worksheet not found in genedata.subset"))
  else {
    NR.Chem.Prior.Mean[this.cas,this.nr] <- this.ac50
    NR.Chem.Prior.SD[this.cas,this.nr] <- 20
    NR.Chem.Prior.Prec[this.cas,this.nr] <- NR.Chem.Prior.SD[this.cas,this.nr]^2
  }
}

Chem.Possible.AC50s <- cbind(Concs.Tested,apply(Concs.Tested,1,function(x) min(x,na.rm=T))-
0.5,apply(Concs.Tested,1,function(x) max(x,na.rm=T))+0.5)
Chem.Possible.AC50s <- t(apply(Chem.Possible.AC50s,1,function(x) sort(x,na.last=T)))
NR.Chem.Prior <-
array(rep(Chem.Possible.AC50s,Num.NR),dim=c(Num.Chems,dim(Chem.Possible.AC50s)[2],Num.NR),di
mnames=list(Chem.Names,NULL,NRs))

NR.Chem.Prior[] <- 0
for (this.chem in Chem.Names)
for (this.NR in NRs)
{
  if (!is.na(NR.Chem.Prior.Mean[this.chem,this.NR]))
  {
    mnc <- min(Concs.Tested[this.chem,],na.rm=T)
    mxc <- max(Concs.Tested[this.chem,],na.rm=T)
    if (NR.Chem.Prior.Mean[this.chem,this.NR]<200)
    {
      # Prior information that there is activity:
      if (log10(NR.Chem.Prior.Mean[this.chem,this.NR]) < mnc)
      {
        # Very potent activity (e.g.,testosterone):
        NR.Chem.Prior[this.chem,Chem.Possible.AC50s[this.chem,]<=(mnc+0.5),this.NR] <- 1
      } else NR.Chem.Prior[this.chem,Chem.Possible.AC50s[this.chem,]<=mxc,this.NR] <- 1
    } else if (this.chem == "57-30-7" & NR.Chem.Prior.Mean[this.chem,this.NR]<600) {
      #Phenobarb is a special case:
    }
  }
}
```

Supplementary Material for “High-Throughput Toxicogenomic Screening of Chemicals in the Environment Using Metabolically Competent Hepatic Cell Cultures”

```
NR.Chem.Prior[this.chem,Chem.Possible.AC50s[this.chem,]<=mxc,this.NR] <- 1
} else {
  # Prior information that there is no potent activity:
  NR.Chem.Prior[this.chem,Chem.Possible.AC50s[this.chem,]>mxc,this.NR] <- 1
}
} else NR.Chem.Prior[this.chem,,this.NR] <- 1
# Empty indices should not be sampled:
NR.Chem.Prior[this.chem,is.na(Chem.Possible.AC50s[this.chem,]),this.NR] <- 0
}
Chem.Possible.AC50s[is.na(Chem.Possible.AC50s)]<-99
source("plot-NR-AC50-prior-112415.R")
```



Supplementary Material for “High-Throughput Toxicogenomic Screening of Chemicals in the Environment Using Metabolically Competent Hepatic Cell Cultures”

```
create-refchem-figure-052218.R
```

```
library(ComplexHeatmap)
```

```
library(circlize)
```

```
setwd("L:/Lab/NCCT_ExpoCast/ExpoCast2018/heparg")
```

```
load("L:/Lab/NCCT_ExpoCast/ExpoCast2018/heparg/HepaRG-Ref-Step1-Jul17-2017-11-02-  
preJAGS.RData")
```

```
#source("plot-NR-AC50-prior-112415.R")
```

```
#source("plot.data-062915.R")
```

```
#plot.data(hepdata,NR.genes,Chem.Names,Chem.Full.Names,file.stub=paste(FILENAME,"-Simplified-  
LTEA-Data-",sep=""))
```

```
Num.Genes <- length(NR.genes)
```

```
Num.Chems <- length(Chem.Names)
```

```
max.conc <- max(hepdata$conc)
```

```
hep.heatmap <- matrix(0,ncol=Num.Genes,nrow=Num.Chems)
```

```
colnames(hep.heatmap) <- NR.genes
```

```
rownames(hep.heatmap) <- Chem.Full.Names
```

```
for (this.chem in Chem.Full.Names)
```

```
{
```

```
  print(this.chem)
```

```
  for (this.gene in NR.genes)
```

```
  {
```

```
    max.conc <- max(Concs.Tested[Chem.Full.Names==this.chem],na.rm=T)
```

```
    this.data <- subset(hepdata,gene==this.gene&casn==Chem.Names[Chem.Full.Names==this.chem])
```

```
    if (any(this.data$state==2))
```

```
    {
```

```
      ac50 <- subset(this.data,state==2)
```

```
      ac50 <- min(ac50$conc)
```

```
      hep.heatmap[this.chem,this.gene] <- max.conc-ac50
```

```
    } else if (any(this.data$state==3)) {
```

```
      ac50 <- subset(this.data,state==3)
```

```
      ac50 <- min(ac50$conc)
```

```
      hep.heatmap[this.chem,this.gene] <- ac50-max.conc
```

```
    }
```

```
  }
```

```
}
```

```
# Remove genes that showed no activity:
```

```
hep.heatmap <- hep.heatmap[,apply(hep.heatmap,2,function(x) !all(is.na(x)))]
```

```
hep.heatmap <- hep.heatmap[,apply(hep.heatmap,2,function(x) !all(x==0))]
```

Supplementary Material for "High-Throughput Toxicogenomic Screening of Chemicals in the Environment Using Metabolically Competent Hepatic Cell Cultures"

```
NR.AC50.prior <- matrix(NA,nrow=Num.Chems,ncol=Num.NR)
rownames(NR.AC50.prior) <- Chem.Full.Names
colnames(NR.AC50.prior) <- NRs
for (this.chem in Chem.Full.Names)
{
  print(this.chem)
  max.conc <- max(Concs.Tested[Chem.Full.Names==this.chem],na.rm=T)
  print(max.conc)
  for (this.NR in NRs)
  {
    if (!is.na(NR.Chem.Prior.Mean[Chem.Names[Chem.Full.Names==this.chem],this.NR]))
    {
      if (log10(NR.Chem.Prior.Mean[Chem.Names[Chem.Full.Names==this.chem],this.NR]) < max.conc)
      {
        NR.AC50.prior[this.chem,this.NR] <- max.conc-
log10(NR.Chem.Prior.Mean[Chem.Names[Chem.Full.Names==this.chem],this.NR])
      } else {
        NR.AC50.prior[this.chem,this.NR] <- 0
      }
    }
  }
}

ht1 = Heatmap(hep.heatmap,
  name = "ht1",
  col = colorRamp2(c(-3.5, 0, 3.5), c("red", "white", "green")),
  row_title = "Reference Chemicals",
  column_title="Genes",
  column_names_gp = gpar(fontsize = 10),
  heatmap_legend_param = list(title = "Potency\n(Up/Down)", at = c(-3,-1, 0,1,3),labels =c("0.1 uM
(down)","10 uM (down)","> 100 uM","10 uM (up)","0.1 uM (up)"),
  color_bar = "discrete")

ht2 = Heatmap(NR.AC50.prior, name = "ht2",
  show_row_names=F,
  col = colorRamp2(c(-3.5, 0, 3.5), c("red", "white", "green")),
  row_title = "Reference Chemicals",
  column_names_gp = gpar(fontsize = 10),
  column_title="Reference NR Potency",
  show_heatmap_legend =F)

ht2+ht1

write.csv(hep.heatmap,file=paste("RefChem-GeneActivity-",Sys.Date(),".txt",sep=""))
write.csv(NR.AC50.prior,file=paste("RefChem-NRPrior-",Sys.Date(),".txt",sep=""))
```

Supplementary Material for “High-Throughput Toxicogenomic Screening of Chemicals in the Environment Using Metabolically Competent Hepatic Cell Cultures”

do.JAGS-090617.R

# Now we run JAGS:

```
do.JAGS <- function(this.NR)
{
  if(length(list.files(pattern=paste(FILENAME,"-",this.NR,"-2017*",sep="")))==0)
  {

    these.ref.chems <- subset(NR.chem.prior,AC50<100 & AC50!=1 & tolower(NR)==tolower(this.NR))$CAS
    if (this.NR == "CAR") these.ref.chems <- c(these.ref.chems,"57-30-7")
    these.ref.chems <- unique(these.ref.chems)
    temp.hepdata <- subset(hepdata,casn %in% these.ref.chems)
    temp.hepdata <- subset(temp.hepdata, conc<1.5 | casn=="57-30-7")
    temp.hepdata$gene <- as.character(temp.hepdata$gene)

    genelist <- NULL
    for (this.gene in unique(hepdata$gene))
    {
      if (any(subset(temp.hepdata,gene==this.gene)$state>1)) genelist <- c(genelist,this.gene)
    }
    cat(paste(this.NR,": ",genelist,"\n"))
    Num.Genes <- length(genelist)
    this.hepdata <- subset(hepdata,gene %in% genelist)
    this.hepdata$gene <- as.character(this.hepdata$gene)
    this.hepdata$gene.id <- sapply(this.hepdata$gene,function(x) which(genelist==x))

    Num.Obs <- dim(this.hepdata)[1]
    Num.NR <- 1

    # And we use this to build a table of which NR's are off (0) or on (1) for each state:
    NR.cat.boolean <- NULL

    for(i in 0:(2^Num.NR-1)) NR.cat.boolean <-
    cbind(NR.cat.boolean,as.numeric(strsplit(to.binary(i,Num.NR),"")[1]))

    this.NR.gene.prior <- subset(NR.gene.prior.final,NR==this.NR & genesymbol%in%genelist)
    this.NR.gene.prior$gene.id <- sapply(this.NR.gene.prior$genesymbol,function(x) which(genelist==x))
    this.NR.gene.prior$NR.id <- 1
    Num.Lit.Obs <- dim(this.NR.gene.prior)[1]

    #
    save(RJAGS.MODEL.FILE,NUM.CHAINS,Num.NR,Num.Genes,NR.Chem.Prior.Mean,NR.Chem.Prior,this.NR,
    Num.Lit.Obs.Up,Num.Lit.Obs.Down,genelist,these.ref.chems,Chem.Names,this.hepdata,file=paste(FILENAME,"-",this.NR,"-PREJAGS-",Sys.Date(),".RData",sep=""))

    # We need initial conditions for the censored (literature) data:
    inits <- list()
    for (chain in 1:NUM.CHAINS)
```

Supplementary Material for “High-Throughput Toxicogenomic Screening of Chemicals in the Environment Using Metabolically Competent Hepatic Cell Cultures”

```

{
  NR.Gene.Network          <-          matrix(sample(c(rep(0,9),1,-
1),Num.Genes,replace=T),nrow=Num.Genes,ncol=Num.NR)
  NR.AC50.index <- NR.Chem.Prior.Mean[,1]
  NR.AC50.index[] <- NA
  for (i in Chem.Names)
    if (length(which(NR.Chem.Prior[i,,this.NR]==1))==1)
      {
        NR.AC50.index[i] <- which(NR.Chem.Prior[i,,this.NR]==1)
      } else {
        NR.AC50.index[i] <- sample(which(NR.Chem.Prior[i,,this.NR]==1),1)
      }
  # if (any(NR.AC50 > NR.Chem.Prior.Max[,this.NR]) | any(NR.AC50 < NR.Chem.Prior.Min[,this.NR]))
browser()
  inits[[paste("inits",chain,sep="")] ] <- list(
    .RNG.seed=as.numeric(paste(rep(chain,6),sep="",collapse="")),
    .RNG.name="base::Super-Duper",
    Lit.Obs=rep(0.2,Num.Lit.Obs),
    log.Lit.Obs.Precision=runif(1,-6,-3),
    NR.Gene.Network=NR.Gene.Network,
    NR.AC50.index=matrix(NR.AC50.index,nrow=Num.Chems,ncol=1),
    # P.lowest=10^runif(1,-2,-1),
    P2min=runif(Num.Genes,0.1,0.2),
    P3min=runif(Num.Genes,0.1,0.2),
    Lit.Threshold=0.1)
}

this.data <- list('Obs.State' = this.hepdata[, "state"],
                 'Num.Obs' = Num.Obs,
                 'Num.Genes' = Num.Genes,
                 'Num.Concs' = Num.Concs,
                 'Num.Chems' = Num.Chems,
                 'Num.NR' = Num.NR,
                 "Network.Response" = as.matrix(cbind(rep(0,Num.Genes),rep(NA,Num.Genes))),
                 'NR.Chem.Prior'
                 =
array(NR.Chem.Prior[Chem.Names,,this.NR],dim=c(dim(NR.Chem.Prior)[1:2],1)),
#
                 'NR.cat.boolean' = NR.cat.boolean,
                 'Concs.Tested' = Concs.Tested,
                 'Chem.Possible.AC50s' = Chem.Possible.AC50s,
                 'Obs.Chem' = this.hepdata[, "chem.id"],
                 'Obs.Conc' = this.hepdata[, "conc.id"],
                 'Obs.Gene' = this.hepdata[, "gene.id"],
                 'Num.Lit.Obs' = Num.Lit.Obs,
                 'Lit.Obs' = rep(NA,Num.Lit.Obs),
                 'is.Signif.Lit.Obs' = rep(1,Num.Lit.Obs),
                 'Lit.Obs.Gene' = this.NR.gene.prior[, "gene.id"],
                 'Lit.Obs.NR' = rep(1,Num.Lit.Obs))

```

Supplementary Material for “High-Throughput Toxicogenomic Screening of Chemicals in the Environment Using Metabolically Competent Hepatic Cell Cultures”

```
save(inits,this.data,RJAGS.MODEL.FILE,NUM.CHAINS,this.NR,genelist,these.ref.chems,Chem.Names,file=paste(FILENAME,"-",this.NR,"-PREJAGS-",Sys.Date(),".RData",sep=""))
```

```
cat(paste("\n\nBeginning a Bayesian run with ",Num.Obs," observations of gene expression for ",Num.Chems," chemicals.\n\nInferring an interaction matrix of ",Num.Genes," genes driven by ",Num.NR," nuclear receptors.\n\nPrior information on NR-gene interactions taken from ",Num.Lit.Obs," journal articles.\n\n\n",sep=""))
```

```
coda.out <- autorun.jags(RJAGS.MODEL.FILE,
  n.chains = NUM.CHAINS,
  method="parallel", method.options=list(cl=cl2),
  summarise=T,
  inits = inits,
  startsample=4000,
  thin.sample=T,
  adapt=200000,
  startburnin=100000,
  psrf.target = 1.20,
  data = this.data,
  max.time="2w",
  monitor = c('NR.Gene.Network'))
save(coda.out,genelist,Chem.Names,file=paste(FILENAME,"-",this.NR,"-",Sys.Date(),".RData",sep=""))

return(list(genelist=genelist,coda.out=coda.out))
}
}
```

Supplementary Material for “High-Throughput Toxicogenomic Screening of Chemicals in the Environment Using Metabolically Competent Hepatic Cell Cultures”

[get-NRs-and-RefChems-070715.R](#)

```
# Now read in the chemical-specific NR interaction prior information (Jill/John):
```

```
NR.chem.prior <- read.xls(NR.CHEM.PRIOR.TABLE,stringsAsFactors=F)
```

```
# Make sure the AC50's are numeric (not text)
```

```
NR.chem.prior$AC50 <- as.numeric(NR.chem.prior$AC50)
```

```
# Get rid of the entries that are NA:
```

```
NR.chem.prior <- subset(NR.chem.prior,!is.na(AC50))
```

```
# The reference chemicals are the ones in this table
```

```
Ref.chems <- unique(NR.chem.prior$CAS)
```

```
# The NRs are also set by the chemical prior table:
```

```
NRs <- sort(unique(toupper(NR.chem.prior$NR)))
```

```
Num.NR <- length(NRs)
```

### heatmap.3.r

```
heatmap.3 <- function(x,
  Rowv = TRUE, Colv = if (symm) "Rowv" else TRUE,
  distfun = dist,
  hclustfun = hclust,
  dendrogram = c("both", "row", "column", "none"),
  symm = FALSE,
  scale = c("none", "row", "column"),
  na.rm = TRUE,
  revC = identical(Colv, "Rowv"),
  add.expr,
  breaks,
  symbreaks = max(x < 0, na.rm = TRUE) || scale != "none",
  col = "heat.colors",
  colsep,
  rowsep,
  sepcolor = "white",
  sepwidth = c(0.05, 0.05),
  cellnote,
  notecex = 1,
  notecol = "cyan",
  na.color = par("bg"),
  trace = c("none", "column", "row", "both"),
  tracecol = "cyan",
  hline = median(breaks),
  vline = median(breaks),
  linecol = tracecol,
  margins = c(5,5),
  ColSideColors,
  RowSideColors,
  side.height.fraction=0.3,
  cexRow = 0.2 + 1/log10(nr),
  cexCol = 0.2 + 1/log10(nc),
  labRow = NULL,
  labCol = NULL,
  key = TRUE,
  keysize = 1.5,
  density.info = c("none", "histogram", "density"),
  denscol = tracecol,
  symkey = max(x < 0, na.rm = TRUE) || symbreaks,
  densadj = 0.25,
  main = NULL,
  xlab = NULL,
  ylab = NULL,
  lmat = NULL,
  lhei = NULL,
  lwid = NULL,
  ColSideColorsSize = 1,
```

```
RowSideColorsSize = 1,
KeyValueName="Value",...){

invalid <- function (x) {
  if (missing(x) || is.null(x) || length(x) == 0)
    return(TRUE)
  if (is.list(x))
    return(all(sapply(x, invalid)))
  else if (is.vector(x))
    return(all(is.na(x)))
  else return(FALSE)
}

x <- as.matrix(x)
scale01 <- function(x, low = min(x), high = max(x)) {
  x <- (x - low)/(high - low)
  x
}
retval <- list()
scale <- if (symm && missing(scale))
  "none"
else match.arg(scale)
dendrogram <- match.arg(dendrogram)
trace <- match.arg(trace)
density.info <- match.arg(density.info)
if (length(col) == 1 && is.character(col))
  col <- get(col, mode = "function")
if (!missing(breaks) && (scale != "none"))
  warning("Using scale=\"row\" or scale=\"column\" when breaks are",
    "specified can produce unpredictable results.", "Please consider using only one or the other.")
if (is.null(Rowv) || is.na(Rowv))
  Rowv <- FALSE
if (is.null(Colv) || is.na(Colv))
  Colv <- FALSE
else if (Colv == "Rowv" && !isTRUE(Rowv))
  Colv <- FALSE
if (length(di <- dim(x)) != 2 || !is.numeric(x))
  stop("`x' must be a numeric matrix")
nr <- di[1]
nc <- di[2]
if (nr <= 1 || nc <= 1)
  stop("`x' must have at least 2 rows and 2 columns")
if (!is.numeric(margins) || length(margins) != 2)
  stop("`margins' must be a numeric vector of length 2")
if (missing(cellnote))
  cellnote <- matrix("", ncol = ncol(x), nrow = nrow(x))
if (!inherits(Rowv, "dendrogram")) {
  if (((!isTRUE(Rowv)) || (is.null(Rowv))) && (dendrogram %in%
```



```
  c("both", "row")) {
    if (is.logical(Colv) && (Colv))
      dendrogram <- "column"
    else dendrogram <- "none"
    warning("Discrepancy: Rowv is FALSE, while dendrogram is `",
      dendrogram, "'. Omitting row dendrogram.")
  }
}
if (!inherits(Colv, "dendrogram")) {
  if (((!isTRUE(Colv)) || (is.null(Colv))) && (dendrogram %in%
    c("both", "column"))) {
    if (is.logical(Rowv) && (Rowv))
      dendrogram <- "row"
    else dendrogram <- "none"
    warning("Discrepancy: Colv is FALSE, while dendrogram is `",
      dendrogram, "'. Omitting column dendrogram.")
  }
}
if (inherits(Rowv, "dendrogram")) {
  ddr <- Rowv
  rowInd <- order.dendrogram(DDR)
}
else if (is.integer(Rowv)) {
  hcr <- hclustfun(distfun(x))
  ddr <- as.dendrogram(hcr)
  ddr <- reorder(DDR, Rowv)
  rowInd <- order.dendrogram(DDR)
  if (nr != length(rowInd))
    stop("row dendrogram ordering gave index of wrong length")
}
else if (isTRUE(Rowv)) {
  Rowv <- rowMeans(x, na.rm = na.rm)
  hcr <- hclustfun(distfun(x))
  ddr <- as.dendrogram(hcr)
  ddr <- reorder(DDR, Rowv)
  rowInd <- order.dendrogram(DDR)
  if (nr != length(rowInd))
    stop("row dendrogram ordering gave index of wrong length")
}
else {
  rowInd <- nr:1
}
if (inherits(Colv, "dendrogram")) {
  ddc <- Colv
  colInd <- order.dendrogram(DDC)
}
else if (identical(Colv, "Rowv")) {
  if (nr != nc)
```

```
    stop("Colv = \"Rowv\" but nrow(x) != ncol(x)")
  if (exists("ddr")) {
    ddc <- ddr
    colInd <- order.dendrogram(ddc)
  }
  else colInd <- rowInd
}
else if (is.integer(Colv)) {
  hcc <- hclustfun(distfun(if (symm)
    x
  else t(x)))
  ddc <- as.dendrogram(hcc)
  ddc <- reorder(ddc, Colv)
  colInd <- order.dendrogram(ddc)
  if (nc != length(colInd))
    stop("column dendrogram ordering gave index of wrong length")
}
else if (isTRUE(Colv)) {
  Colv <- colMeans(x, na.rm = na.rm)
  hcc <- hclustfun(distfun(if (symm)
    x
  else t(x)))
  ddc <- as.dendrogram(hcc)
  ddc <- reorder(ddc, Colv)
  colInd <- order.dendrogram(ddc)
  if (nc != length(colInd))
    stop("column dendrogram ordering gave index of wrong length")
}
else {
  colInd <- 1:nc
}
retval$rowInd <- rowInd
retval$colInd <- colInd
retval$call <- match.call()
x <- x[rowInd, colInd]
x.unscaled <- x
cellnote <- cellnote[rowInd, colInd]
if (is.null(labRow))
  labRow <- if (is.null(rownames(x)))
    (1:nr)[rowInd]
  else rownames(x)
else labRow <- labRow[rowInd]
if (is.null(labCol))
  labCol <- if (is.null(colnames(x)))
    (1:nc)[colInd]
  else colnames(x)
else labCol <- labCol[colInd]
if (scale == "row") {
```

```
retval$rowMeans <- rm <- rowMeans(x, na.rm = na.rm)
x <- sweep(x, 1, rm)
retval$rowSDs <- sx <- apply(x, 1, sd, na.rm = na.rm)
x <- sweep(x, 1, sx, "/")
}
else if (scale == "column") {
  retval$colMeans <- rm <- colMeans(x, na.rm = na.rm)
  x <- sweep(x, 2, rm)
  retval$colSDs <- sx <- apply(x, 2, sd, na.rm = na.rm)
  x <- sweep(x, 2, sx, "/")
}
if (missing(breaks) || is.null(breaks) || length(breaks) < 1) {
  if (missing(col) || is.function(col))
    breaks <- 16
  else breaks <- length(col) + 1
}
if (length(breaks) == 1) {
  if (!symbreaks)
    breaks <- seq(min(x, na.rm = na.rm), max(x, na.rm = na.rm),
      length = breaks)
  else {
    extreme <- max(abs(x), na.rm = TRUE)
    breaks <- seq(-extreme, extreme, length = breaks)
  }
}
nbr <- length(breaks)
ncol <- length(breaks) - 1
if (class(col) == "function")
  col <- col(ncol)
min.breaks <- min(breaks)
max.breaks <- max(breaks)
x[x < min.breaks] <- min.breaks
x[x > max.breaks] <- max.breaks
if (missing(lhei) || is.null(lhei))
  lhei <- c(keysize, 4)
if (missing(lwid) || is.null(lwid))
  lwid <- c(keysize, 4)
if (missing(lmat) || is.null(lmat)) {
  lmat <- rbind(4:3, 2:1)

  if (!missing(ColSideColors)) {
    #if (!is.matrix(ColSideColors))
    #stop("'ColSideColors' must be a matrix")
    if (!is.character(ColSideColors) || nrow(ColSideColors) != nc)
      stop("'ColSideColors' must be a matrix of nrow(x) rows")
    lmat <- rbind(lmat[1, ] + 1, c(NA, 1), lmat[2, ] + 1)
    #lhei <- c(lhei[1], 0.2, lhei[2])
    lhei=c(lhei[1], side.height.fraction*ColSideColorsSize/2, lhei[2])
  }
}
```

```

}

if (!missing(RowSideColors)) {
  #if (!is.matrix(RowSideColors))
  #stop("'RowSideColors' must be a matrix")
  if (!is.character(RowSideColors) || ncol(RowSideColors) != nr)
    stop("'RowSideColors' must be a matrix of ncol(x) columns")
  lmat <- cbind(lmat[, 1] + 1, c(rep(NA, nrow(lmat) - 1), 1), lmat[,2] + 1)
  #lwid <- c(lwid[1], 0.2, lwid[2])
  lwid <- c(lwid[1], side.height.fraction*RowSideColorsSize/2, lwid[2])
}
lmat[is.na(lmat)] <- 0
}

if (length(lhei) != nrow(lmat))
  stop("lhei must have length = nrow(lmat) = ", nrow(lmat))
if (length(lwid) != ncol(lmat))
  stop("lwid must have length = ncol(lmat) = ", ncol(lmat))
op <- par(no.readonly = TRUE)
on.exit(par(op))

layout(lmat, widths = lwid, heights = lhei, respect = FALSE)

if (!missing(RowSideColors)) {
  if (!is.matrix(RowSideColors)){
    par(mar = c(margins[1], 0, 0, 0.5))
    image(rbind(1:nr), col = RowSideColors[rowInd], axes = FALSE)
  } else {
    par(mar = c(margins[1], 0, 0, 0.5))
    rsc = t(RowSideColors[,rowInd, drop=F])
    rsc.colors = matrix()
    rsc.names = names(table(rsc))
    rsc.i = 1
    for (rsc.name in rsc.names) {
      rsc.colors[rsc.i] = rsc.name
      rsc[rsc == rsc.name] = rsc.i
      rsc.i = rsc.i + 1
    }
    rsc = matrix(as.numeric(rsc), nrow = dim(rsc)[1])
    image(t(rsc), col = as.vector(rsc.colors), axes = FALSE)
    if (length(rownames(RowSideColors)) > 0) {
      axis(1, 0:(dim(rsc)[2] - 1)/max(1,(dim(rsc)[2] - 1)), rownames(RowSideColors), las = 2, tick =
FALSE)
    }
  }
}
}

if (!missing(ColSideColors)) {

```

```
if (!is.matrix(ColSideColors)){
  par(mar = c(0.5, 0, 0, margins[2]))
  image(cbind(1:nc), col = ColSideColors[colInd], axes = FALSE)
} else {
  par(mar = c(0.5, 0, 0, margins[2]))
  csc = ColSideColors[colInd, , drop=F]
  csc.colors = matrix()
  csc.names = names(table(csc))
  csc.i = 1
  for (csc.name in csc.names) {
    csc.colors[csc.i] = csc.name
    csc[csc == csc.name] = csc.i
    csc.i = csc.i + 1
  }
  csc = matrix(as.numeric(csc), nrow = dim(csc)[1])
  image(csc, col = as.vector(csc.colors), axes = FALSE)
  if (length(colnames(ColSideColors)) > 0) {
    axis(2, 0:(dim(csc)[2] - 1)/max(1,(dim(csc)[2] - 1)), colnames(ColSideColors), las = 2, tick = FALSE)
  }
}
}

par(mar = c(margins[1], 0, 0, margins[2]))
x <- t(x)
cellnote <- t(cellnote)
if (revC) {
  iy <- nr:1
  if (exists("ddr"))
    ddr <- rev(ddr)
  x <- x[, iy]
  cellnote <- cellnote[, iy]
}
else iy <- 1:nr
image(1:nc, 1:nr, x, xlim = 0.5 + c(0, nc), ylim = 0.5 + c(0, nr), axes = FALSE, xlab = "", ylab = "", col = col,
breaks = breaks, ...)
retval$carpet <- x
if (exists("ddr"))
  retval$rowDendrogram <- ddr
if (exists("ddc"))
  retval$colDendrogram <- ddc
retval$breaks <- breaks
retval$col <- col
if (!invalid(na.color) & any(is.na(x))) { # load library(gplots)
  mmat <- ifelse(is.na(x), 1, NA)
  image(1:nc, 1:nr, mmat, axes = FALSE, xlab = "", ylab = "",
    col = na.color, add = TRUE)
}
```

Supplementary Material for “High-Throughput Toxicogenomic Screening of Chemicals in the Environment Using Metabolically Competent Hepatic Cell Cultures”

```

axis(1, 1:nc, labels = labCol, las = 2, line = -0.5, tick = 0,
     cex.axis = cexCol)
if (!is.null(xlab))
  mtext(xlab, side = 1, line = margins[1] - 1.25)
axis(4, iy, labels = labRow, las = 2, line = -0.5, tick = 0,
     cex.axis = cexRow)
if (!is.null(ylab))
  mtext(ylab, side = 4, line = margins[2] - 1.25)
if (!missing(add.expr))
  eval(substitute(add.expr))
if (!missing(colsep))
  for (csep in colsep) rect(xleft = csep + 0.5, ybottom = rep(0, length(csep)), xright = csep + 0.5 +
sepwidth[1], ytop = rep(ncol(x) + 1, csep), lty = 1, lwd = 1, col = sepcolor, border = sepcolor)
if (!missing(rowsep))
  for (rsep in rowsep) rect(xleft = 0, ybottom = (ncol(x) + 1 - rsep) - 0.5, xright = nrow(x) + 1, ytop =
(ncol(x) + 1 - rsep) - 0.5 - sepwidth[2], lty = 1, lwd = 1, col = sepcolor, border = sepcolor)
min.scale <- min(breaks)
max.scale <- max(breaks)
x.scaled <- scale01(t(x), min.scale, max.scale)
if (trace %in% c("both", "column")) {
  retval$vline <- vline
  vline.vals <- scale01(vline, min.scale, max.scale)
  for (i in colInd) {
    if (!is.null(vline)) {
      abline(v = i - 0.5 + vline.vals, col = linecol,
            lty = 2)
    }
    xv <- rep(i, nrow(x.scaled)) + x.scaled[, i] - 0.5
    xv <- c(xv[1], xv)
    yv <- 1:length(xv) - 0.5
    lines(x = xv, y = yv, lwd = 1, col = tracecol, type = "s")
  }
}
if (trace %in% c("both", "row")) {
  retval$hline <- hline
  hline.vals <- scale01(hline, min.scale, max.scale)
  for (i in rowInd) {
    if (!is.null(hline)) {
      abline(h = i + hline, col = linecol, lty = 2)
    }
    yv <- rep(i, ncol(x.scaled)) + x.scaled[, i] - 0.5
    yv <- rev(c(yv[1], yv))
    xv <- length(yv):1 - 0.5
    lines(x = xv, y = yv, lwd = 1, col = tracecol, type = "s")
  }
}
if (!missing(cellnote))
  text(x = c(row(cellnote)), y = c(col(cellnote)), labels = c(cellnote),

```

```
col = notecol, cex = notecex)
par(mar = c(margins[1], 0, 0, 0))
if (dendrogram %in% c("both", "row")) {
  plot(DDR, horiz = TRUE, axes = FALSE, yaxs = "i", leaflab = "none")
}
else plot.new()
par(mar = c(0, 0, if (!is.null(main)) 5 else 0, margins[2]))
if (dendrogram %in% c("both", "column")) {
  plot(ddc, axes = FALSE, xaxs = "i", leaflab = "none")
}
else plot.new()
if (!is.null(main))
  title(main, cex.main = 1.5 * op[["cex.main"]])
if (key) {
  par(mar = c(5, 4, 2, 1), cex = 0.75)
  tmpbreaks <- breaks
  if (symkey) {
    max.raw <- max(abs(c(x, breaks)), na.rm = TRUE)
    min.raw <- -max.raw
    tmpbreaks[1] <- -max(abs(x), na.rm = TRUE)
    tmpbreaks[length(tmpbreaks)] <- max(abs(x), na.rm = TRUE)
  }
  else {
    min.raw <- min(x, na.rm = TRUE)
    max.raw <- max(x, na.rm = TRUE)
  }
}

z <- seq(min.raw, max.raw, length = length(col))
image(z = matrix(z, ncol = 1), col = col, breaks = tmpbreaks,
      xaxt = "n", yaxt = "n")
par(usr = c(0, 1, 0, 1))
lv <- pretty(breaks)
xv <- scale01(as.numeric(lv), min.raw, max.raw)
axis(1, at = xv, labels = lv)
if (scale == "row")
  mtext(side = 1, "Row Z-Score", line = 2)
else if (scale == "column")
  mtext(side = 1, "Column Z-Score", line = 2)
else mtext(side = 1, KeyValueHandling, line = 2)
if (density.info == "density") {
  dens <- density(x, adjust = densadj, na.rm = TRUE)
  omit <- dens$x < min(breaks) | dens$x > max(breaks)
  dens$x <- dens$x[-omit]
  dens$y <- dens$y[-omit]
  dens$x <- scale01(dens$x, min.raw, max.raw)
  lines(dens$x, dens$y/max(dens$y) * 0.95, col = denscol,
        lwd = 1)
  axis(2, at = pretty(dens$y)/max(dens$y) * 0.95, pretty(dens$y))
}
```

```
    title("Color Key\nand Density Plot")
    par(cex = 0.5)
    mtext(side = 2, "Density", line = 2)
  }
  else if (density.info == "histogram") {
    h <- hist(x, plot = FALSE, breaks = breaks)
    hx <- scale01(breaks, min.raw, max.raw)
    hy <- c(h$counts, h$counts[length(h$counts)])
    lines(hx, hy/max(hy) * 0.95, lwd = 1, type = "s",
          col = denscol)
    axis(2, at = pretty(hy)/max(hy) * 0.95, pretty(hy))
    title("Color Key\nand Histogram")
    par(cex = 0.5)
    mtext(side = 2, "Count", line = 2)
  }
  else title("Color Key")
}
else plot.new()
retval$colorTable <- data.frame(low = retval$breaks[-length(retval$breaks)],
  high = retval$breaks[-1], color = retval$col)
invisible(retval)
}
```



myclust.R

```
#Define custom dist and hclust functions for use with heatmaps
myclust=function(c) {hclust(c,method="average")}
na.dist <- function(x,method="euclidian",...) {
  t.dist <- dist(x,...)
  t.dist <- as.matrix(t.dist)
  t.limit <- 1.1*max(t.dist,na.rm=T)
  t.dist[is.na(t.dist)] <- t.limit
  t.dist <- as.dist(t.dist)
  return(t.dist)
}
```

Supplementary Material for “High-Throughput Toxicogenomic Screening of Chemicals in the Environment Using Metabolically Competent Hepatic Cell Cultures”

[plot.data-062915.R](#)

```
#Load latest version of heatmap.3 function:
```

```
source("heatmap3.R")
```

```
#Clustering function that handles NA's:
```

```
source("myclust.R")
```

```
plot.data <- function(hepdata,NR.genes,Chem.Names,Chem.Full.Names,file.stub="Simplified-LTEA-Ref-Data-")
```

```
{
```

```
  Num.Genes <- length(NR.genes)
```

```
  Num.Chems <- length(Chem.Names)
```

```
  max.conc <- max(hepdata$conc)
```

```
  hep.heatmap <- matrix(NA,nrow=Num.Genes,ncol=Num.Chems)
```

```
  rownames(hep.heatmap) <- NR.genes
```

```
  colnames(hep.heatmap) <- Chem.Full.Names
```

```
  for (this.gene in NR.genes)
```

```
    for (this.chem in Chem.Full.Names)
```

```
    {
```

```
      this.data <- subset(hepdata,gene==this.gene&casn==Chem.Names[Chem.Full.Names==this.chem])
```

```
      if (any(this.data$state==2))
```

```
      {
```

```
        ac50 <- subset(this.data,state==2)
```

```
        ac50 <- min(ac50$conc)
```

```
        hep.heatmap[this.gene,this.chem] <- max.conc-ac50
```

```
      } else if (any(this.data$state==3)) {
```

```
        ac50 <- subset(this.data,state==3)
```

```
        ac50 <- min(ac50$conc)
```

```
        hep.heatmap[this.gene,this.chem] <- -(max.conc-ac50)
```

```
      }
```

```
    }
```

```
pdf(file=paste(file.stub,Sys.Date(),".pdf",sep=""))
```

```
main_title="LTEA Gene Expr. Changes"
```

```
heatmap.3(hep.heatmap,
```

```
  hclustfun=myclust,
```

```
  distfun=na.dist,
```

```
  na.rm = TRUE,
```

```
  scale="none",
```

```
  dendrogram="both",
```

```
  margins=c(10,10),
```

```
  Rowv=TRUE,
```

```
  Colv=TRUE,
```

```
  cexCol=0.8,
```

```
  cexRow=0.5,
```

```
  symbreaks=FALSE,
```

Supplementary Material for “High-Throughput Toxicogenomic Screening of Chemicals in the Environment Using Metabolically Competent Hepatic Cell Cultures”

```
key=TRUE,  
symkey=FALSE,  
density.info="none",  
trace="none",  
main=main_title,  
# labRow=F,  
col=colorRampPalette(c("red","white", "green"))(n = 10),  
KeyValueName="Activity")  
dev.off()  
}
```

plot\_NR\_graph\_posterior-070615.R

```
plot_NR_graph_posterior <- function(Network.Up,Network.Down,threshold=0.0,filename="NR-Initial-
Full-Ref-Post-",layout.style=1,drop.vertices=F)
{
  edge.weights <-NULL
  NR.Gene.Post.graph <- graph.empty(,directed=T)
  NR.Gene.Post.graph <- NR.Gene.Post.graph + vertices(rownames(Network.Up),color="Blue",size=5)
  NR.Gene.Post.graph <- NR.Gene.Post.graph + vertices(colnames(Network.Up),color="Red",size=8)
  for (this.gene in rownames(Network.Up))
    for (this.NR in colnames(Network.Up))
      {
        if (Network.Up[this.gene,this.NR]>threshold)
          {
            NR.Gene.Post.graph <- NR.Gene.Post.graph + edges(c(this.NR,this.gene),color="Green")
            edge.weights[length(edge.weights)+1] <- round(Network.Up[this.gene,this.NR]*100)/10
          }
        else if (Network.Down[this.gene,this.NR]>threshold)
          {
            NR.Gene.Post.graph <- NR.Gene.Post.graph + edges(c(this.NR,this.gene),color="Red")
            edge.weights[length(edge.weights)+1] <- round(Network.Down[this.gene,this.NR]*100)/10
          }
      }

  edge.weights <- edge.weights/max(edge.weights)*4

  if (drop.vertices)
    delete.vertices(NR.Gene.Post.graph,names(degree(NR.Gene.Post.graph)[degree(NR.Gene.Post.graph)==
0]))

  pdf(file=paste(filename,Sys.Date(),".pdf",sep=""))
  if (layout.style==1)
  {
    plot(NR.Gene.Post.graph,vertex.label.dist=.5,vertex.label.color="Black",layout=layout.circle,edge.width=
edge.weights)
  }
  else if (layout.style==2) {
    layout <- layout.reingold.tilford(NR.Gene.Post.graph, circular=T)

    plot(NR.Gene.Post.graph,vertex.label.dist=.5,vertex.label.color="Black",layout=layout.fruchterman.reing
old,edge.width=edge.weights)
  }
  dev.off()

  png(file=paste(filename,Sys.Date(),".png",sep=""),width = 960, height = 960)
  if (layout.style==1)
  {
```

Supplementary Material for “High-Throughput Toxicogenomic Screening of Chemicals in the Environment Using Metabolically Competent Hepatic Cell Cultures”

```
plot(NR.Gene.Post.graph,vertex.label.dist=.5,vertex.label.color="Black",layout=layout.circle,edge.width=
edge.weights)
}
else if (layout.style==2) {
  layout <- layout.reingold.tilford(NR.Gene.Post.graph, circular=T)

plot(NR.Gene.Post.graph,vertex.label.dist=.5,vertex.label.color="Black",layout=layout.fruchterman.reing
old,edge.width=edge.weights)
}
dev.off()

return(NR.Gene.Post.graph)
}
```

Supplementary Material for “High-Throughput Toxicogenomic Screening of Chemicals in the Environment Using Metabolically Competent Hepatic Cell Cultures”

plot-NR-AC50-prior-112415.R

```
NR.AC50.prior <- matrix(NA,nrow=Num.Chems,ncol=Num.NR)
rownames(NR.AC50.prior) <- Chem.Full.Names
colnames(NR.AC50.prior) <- NRs
for (i in 1:Num.Chems)
  for (j in 1: Num.NR)
    if (!is.na(NR.Chem.Prior.Mean[i,j]))
      NR.AC50.prior[i,j] <- NR.Chem.Prior.Mean[i,j]
```

#Load latest version of heatmap.3 function:

```
source("heatmap3.R")
```

#Clustering function that handles NA's:

```
source("myclust.R")
```

#Create heatmap using custom heatmap.3 source code loaded above

```
pdf(file=paste(FILENAME,"-NR-AC50-prior-",Sys.Date(),".pdf",sep=""))
```

```
main_title="Ref. Chem. NR Activity Prior"
```

```
heatmap.3(-NR.AC50.prior,
  hclustfun=myclust,
  distfun=na.dist,
  na.rm = TRUE,
  scale="none",
  dendrogram="both",
  margins=c(8,10),
  cexRow=1,
  Rowv=TRUE,
  Colv=TRUE,
  symbreaks=FALSE,
  key=TRUE,
  symkey=FALSE,
  density.info="none",
  trace="none",
  main=main_title,
#   labRow=F,
  col=colorRampPalette(c("blue","red"))(n = 20),
  KeyValueName="Potency (-Log AC50)")
dev.off()
```

Supplementary Material for “High-Throughput Toxicogenomic Screening of Chemicals in the Environment Using Metabolically Competent Hepatic Cell Cultures”

```
plot-NR-inference-043018.r
```

```
set.seed("12345678")
```

```
#Load latest version of heatmap.3 function
```

```
source("heatmap3.R")
```

```
Chem.Possible.AC50s <- jags.data$Chem.Possible.AC50s
```

```
Concs.Tested <- jags.data$Concs.Tested
```

```
#Define custom dist and hclust functions for use with heatmaps
```

```
myclust=function(c) {hclust(c,method="average")}
```

```
na.dist <- function(x,method="euclidian",...) {
```

```
  t.dist <- dist(x,...)
```

```
  t.dist <- as.matrix(t.dist)
```

```
  t.limit <- 1.1*max(t.dist,na.rm=T)
```

```
  t.dist[is.na(t.dist)] <- t.limit
```

```
  t.dist <- as.dist(t.dist)
```

```
  return(t.dist)
```

```
}
```

```
means <- apply(out.mcmc,2,mean)
```

```
medians <- apply(out.mcmc,2,median)
```

```
toxcast <- read.delim("TOXCAST.tsv",sep="\t",stringsAsFactors=F)
```

```
toxcast$CAS.RN <- sapply(toxcast$CAS.RN,function(x) strsplit(x,"=")[[1]][2])
```

```
rownames(toxcast) <- toxcast$CAS.RN
```

```
toxcast["1162-65-8","PREFERRED.NAME"] <- "Aflatoxin B1"
```

```
toxcast["NOCAS_47351","PREFERRED.NAME"] <- "SSR 240612"
```

```
toxcast["NOCAS_47364","PREFERRED.NAME"] <- "SSR 103800"
```

```
toxcast["NOCAS_47389","PREFERRED.NAME"] <- "SAR 150640"
```

```
toxcast <- toxcast[Chem.Names,]
```

```
Chem.Full.Names <- toxcast$PREFERRED.NAME
```

```
NR.response <- matrix(0,nrow=length(Chem.Full.Names),ncol=Num.NR)
```

```
rownames(NR.response) <- Chem.Full.Names
```

```
colnames(NR.response) <- NRs
```

```
for (i in 1:Num.Chems)
```

```
  for (j in 1: Num.NR)
```

```
    {
```

```
      if (medians[paste("NR.AC50.index[",i,"",",j,"",",",sep="")] > max(Concs.Tested[i,],na.rm=T))
```

```
        NR.response[i,j] <- NA
```

Supplementary Material for “High-Throughput Toxicogenomic Screening of Chemicals in the Environment Using Metabolically Competent Hepatic Cell Cultures”

```
else NR.response[i,j] <- medians[paste("NR.AC50.index[" ,i," ,",j,""],sep="")]
}

NR.probability <- matrix(0,nrow=length(Chem.Full.Names),ncol=Num.NR)
rownames(NR.probability) <- Chem.Full.Names
colnames(NR.probability) <- NRs
for (i in 1:Num.Chems)
  for (j in 1: Num.NR)
  {
    NR.probability[i,j] <-
sum(out.mcmc[,paste("NR.AC50.index[" ,i," ,",j,""],sep="")]<max(Concs.Tested[i,],na.rm=T))/dim(out.mcmc)[1]
  }

write.csv(cbind(Chem.Names,NR.response),file=paste(FILENAME,"NR-Response-",Sys.Date(),".txt",sep=""))
write.csv(cbind(Chem.Names,NR.probability),file=paste(FILENAME,"NR-Probs-",Sys.Date(),".txt",sep=""))

#Create heatmap using custom heatmap.3 source code loaded above
pdf(file=paste(FILENAME,"NR-AC50-Posterior-",Sys.Date(),".pdf",sep=""))
main_title="LTEA Inferred NR Activity"
heatmap.3(-NR.response,
  hclustfun=myclust,
  distfun=na.dist,
  na.rm = TRUE,
  scale="none",
  dendrogram="both",
  margins=c(8,10),
  cexRow=1,
  Rowv=TRUE,
  Colv=TRUE,
  symbreaks=FALSE,
  key=TRUE,
  symkey=FALSE,
  density.info="none",
  trace="none",
  main=main_title,
#   labRow=F,
  col=colorRampPalette(c("grey","yellow","red"))(n = 20),
  KeyValueName="Potency (-Log AC50)")
dev.off()
```



Supplementary Material for “High-Throughput Toxicogenomic Screening of Chemicals in the Environment Using Metabolically Competent Hepatic Cell Cultures”

```
posterior-analysis-043018.r
```

```
library(ComplexHeatmap)
```

```
library(circlize)
```

```
#setwd("~/Desktop/heparg")
```

```
load("HepaRG-ToxCast-Apr2018All-PREJAGS-1-2018-04-23.RData")
```

```
load("HepaRG-ToxCast-Apr2018All-2018-04-30-2.RData")
```

```
coda.out <- coda.out[[1]]
```

```
NUM.SAMPLES <- dim(coda.out$mcmc[[1]])[1]
```

```
NUM.SAMPLES.USED.PER.CHAIN <- 1000
```

```
Chem.Possible.AC50s <- jags.data$Chem.Possible.AC50s
```

```
out.mcmc <- out.mcmc
```

```
as.matrix(coda.out$mcmc[[1]][sample(1:NUM.SAMPLES,NUM.SAMPLES.USED.PER.CHAIN),])
```

```
for (i in 1:length(coda.out$mcmc)) out.mcmc <-
```

```
rbind(out.mcmc,as.matrix(coda.out$mcmc[[i]][sample(1:NUM.SAMPLES,NUM.SAMPLES.USED.PER.CHAIN),]))
```

```
for (i in 1:Num.Chems)
```

```
for (j in 1:Num.NR)
```

```
{
```

```
out.mcmc[,paste("NR.AC50.index[",i,"",j,"",sep="")] <-
```

```
Chem.Possible.AC50s[out.mcmc[,paste("NR.AC50.index[",i,"",j,"",sep=")]]
```

```
}
```

```
source("plot-NR-inference-043018.R")
```

```
source("build-posterior-network-043018.R")
```

```
source("plot_NR_graph_posterior-070615.R")
```

```
NR.post.full <- plot_NR_graph_posterior(Network.Up,Network.Down,filename=paste(FILENAME,"-NRgraph-Raw-Posterior-",sep=""))
```

```
threshold <-0.5
```

```
NR.post.reduced <-
```

```
plot_NR_graph_posterior(Network.Up,Network.Down,threshold=threshold,layout.style=2,filename=paste(FILENAME,"-NRgraph-Threshold",threshold,"-Posterior-",sep="))
```

```
NR.post.reduced <-
```

```
plot_NR_graph_posterior(Network.Up,Network.Down,threshold=threshold,layout.style=2,filename=paste(FILENAME,"-NRgraph-Threshold",threshold,"-Dropped-Posterior-",sep="),drop.vertices=T)
```

Supplementary Material for “High-Throughput Toxicogenomic Screening of Chemicals in the Environment Using Metabolically Competent Hepatic Cell Cultures”

```
save(NR.post.reduced,file=paste(FILENAME,"-NRgraph-Threshold",threshold,"-Dropped-Posterior-Graph-",Sys.Date(),".RData",sep=""))
```

```
load("HepaRG-ToxCast-Apr2018All-PREJAGS.RData")
```

```
hep.heatmap <- matrix(0,ncol=Num.Genes,nrow=length(Chem.Full.Names))
```

```
colnames(hep.heatmap) <- NR.genes
```

```
rownames(hep.heatmap) <- Chem.Full.Names
```

```
NR.heatmap <- matrix(0,nrow=length(Chem.Full.Names),ncol=Num.NR)
```

```
colnames(NR.heatmap) <- NRs
```

```
rownames(NR.heatmap) <- Chem.Full.Names
```

```
rownames(NR.response) <- Chem.Full.Names
```

```
for (this.chem in Chem.Full.Names)
```

```
{
```

```
print(this.chem)
```

```
max.conc <- max(Concs.Tested[Chem.Full.Names==this.chem],na.rm=T)
```

```
for (this.gene in NR.genes)
```

```
{
```

```
  this.data <- subset(hepdata,gene==this.gene&casn==Chem.Names[Chem.Full.Names==this.chem])
```

```
  if (any(this.data$state==2))
```

```
  {
```

```
    ac50 <- subset(this.data,state==2)
```

```
    ac50 <- min(ac50$conc)
```

```
    hep.heatmap[this.chem,this.gene] <- -(ac50-max.conc)
```

```
  } else if (any(this.data$state==3)) {
```

```
    ac50 <- subset(this.data,state==3)
```

```
    ac50 <- min(ac50$conc)
```

```
    hep.heatmap[this.chem,this.gene] <- ac50-max.conc
```

```
  }
```

```
}
```

```
for (this.NR in 1:Num.NR)
```

```
{
```

```
  if (!is.na(NR.response[this.chem,this.NR])) NR.heatmap[this.chem,this.NR] <-max.conc-
```

```
  NR.response[this.chem,this.NR]
```

```
}
```

```
}
```

```
ht1 = Heatmap(hep.heatmap, name = "ht1",show_row_names=F,col = colorRamp2(c(-3.5, 0, 3.5), c("red", "white", "green")),row_title = "ToxCast Chemicals",column_title="Active Ref. Chem. Genes",heatmap_legend_param = list(title = "Potency\n(Up/Down)", at = c(-3,-1, 0,1,3),labels =c("0.1 uM (down)","10 uM (down)","> 100 uM","10 uM (up)","0.1 uM (up)"),color_bar = "discrete"))
```

Supplementary Material for “High-Throughput Toxicogenomic Screening of Chemicals in the Environment Using Metabolically Competent Hepatic Cell Cultures”

```
ht2 = Heatmap(NR.heatmap, name = "ht2", show_row_names=F, col = colorRamp2(c(-3.5, 0, 3.5), c("red",  
"white", "green")), row_title = "ToxCast Chemicals", column_title="Inferred NR  
Activation", show_heatmap_legend =F)
```

ht2+ht1

Supplementary Material for “High-Throughput Toxicogenomic Screening of Chemicals in the Environment Using Metabolically Competent Hepatic Cell Cultures”

```
prepare-JAGS-run-012916.R
```

```
library(runjags)
```

```
library(parallel)
```

```
load(paste(FILENAME,"-",Sys.Date(),"-preJAGS.RData",sep=""))
```

```
# We need a function to turn NR states into binary numbers:
```

```
to.binary <- function(x,bits=5)
```

```
{
```

```
  tmp <- paste(sapply(strsplit(paste(rev(intToBits(x))),""),`[,2],collapse="")
```

```
  return(substr(tmp,nchar(tmp)-bits+1,nchar(tmp)))
```

```
}
```

```
# And we use this to build a table of which NR's are off (0) or on (1) for each state:
```

```
NR.cat.boolean <- NULL
```

```
for(i in 0:(2^Num.NR-1) NR.cat.boolean <-
```

```
cbind(NR.cat.boolean,as.numeric(strsplit(to.binary(i,Num.NR),""))[[1]]))
```

```
# Create a small cluster with a core for each chain in the analysis:
```

```
cl2 <- makeCluster(NUM.CHAINS)
```

Supplementary Material for “High-Throughput Toxicogenomic Screening of Chemicals in the Environment Using Metabolically Competent Hepatic Cell Cultures”

read-literature-prior-072017.R

```
# Read table of literature NR-gene interactions with direction (Nancy Baker):
NR.prior.information                                     <-
read.xls(LITERATURE.NR.GENE.INTERACTIONS,skip=1,stringsAsFactors=F,sheet=2)

# Store all the genes from the literature in a vector:
NR.prior.genes <- unique(NR.prior.information$genesymbol)

#source("plot-lit-NR-Network-Raw-070615.R")

# Annotate the NRs in the literature table so that we have consistent terms:
NR.prior.information[NR.prior.information$Nuclear.receptor=="constitutive androstane receptor","NR"]
<- "CAR"
NR.prior.information[NR.prior.information$Nuclear.receptor=="farnesoid X-activated receptor","NR"] <-
"FXR"
NR.prior.information[NR.prior.information$Nuclear.receptor=="pregnane X receptor","NR"] <- "PXR"
NR.prior.information[NR.prior.information$Nuclear.receptor=="Receptors, Aryl Hydrocarbon","NR"] <-
"AHR"
NR.prior.information[NR.prior.information$Nuclear.receptor=="Receptors, Androgen","NR"] <- "AR"
NR.prior.information[NR.prior.information$Nuclear.receptor=="PPAR alpha","NR"] <- "PPARA"

NR.gene.prior.final <- subset(NR.prior.information,genesymbol%in%NR.genes)
Num.Lit.Obs <- dim(NR.gene.prior.final)[1]
NR.gene.prior.final$gene.id <- sapply(NR.gene.prior.final$genesymbol,function(x) which(x==NR.genes))
NR.gene.prior.final$NR.id <- sapply(NR.gene.prior.final$NR,function(x) which(x==NRs))
# We only want the genes that remain in the trimmed list:
NR.prior.genes <- unique(NR.gene.prior.final$genesymbol)

#source("plot-lit-NR-Network-final-070615.R")
```

Supplementary Material for “High-Throughput Toxicogenomic Screening of Chemicals in the Environment Using Metabolically Competent Hepatic Cell Cultures”

ToxCast-NRInference-figure-052218.R

```
library(ComplexHeatmap)
```

```
library(circlize)
```

```
#setwd("~/Desktop/heparg")
```

```
setwd("L:/Lab/NCCT_ExpoCast/ExpoCast2018/heparg")
```

```
load("HepaRG-ToxCast-Apr2018All-PREJAGS-1-2018-04-23.RData")
```

```
load("HepaRG-ToxCast-Apr2018All-2018-04-30-2.RData")
```

```
coda.out <- coda.out[[1]]
```

```
NUM.SAMPLES <- dim(coda.out$mcmc[[1]])[1]
```

```
NUM.SAMPLES.USED.PER.CHAIN <- 1000
```

```
Chem.Possible.AC50s <- jags.data$Chem.Possible.AC50s
```

```
out.mcmc <- out.mcmc
```

```
as.matrix(coda.out$mcmc[[1]][sample(1:NUM.SAMPLES,NUM.SAMPLES.USED.PER.CHAIN),])
```

```
for (i in 1:length(coda.out$mcmc)) out.mcmc <-
```

```
  rbind(out.mcmc,as.matrix(coda.out$mcmc[[i]][sample(1:NUM.SAMPLES,NUM.SAMPLES.USED.PER.CHAIN),]))
```

```
for (i in 1:Num.Chems)
```

```
  for (j in 1:Num.NR)
```

```
    {
```

```
      out.mcmc[,paste("NR.AC50.index[",i," ",j,"",sep="")] <-
```

```
      Chem.Possible.AC50s[out.mcmc[,paste("NR.AC50.index[",i," ",j,"",sep=")]]
```

```
    }
```

```
source("plot-NR-inference-043018.r")
```

```
source("build-posterior-network-043018.R")
```

```
source("plot_NR_graph_posterior-070615.R")
```

```
NR.post.full <- plot_NR_graph_posterior(Network.Up,Network.Down,filename=paste(FILENAME,"-NRgraph-Raw-Posterior-",sep=""))
```

```
threshold <-0.5
```

```
NR.post.reduced <-
```

```
plot_NR_graph_posterior(Network.Up,Network.Down,threshold=threshold,layout.style=2,filename=paste(FILENAME,"-NRgraph-Threshold",threshold,"-Posterior-",sep=""))
```

```
NR.post.reduced <-
```

```
plot_NR_graph_posterior(Network.Up,Network.Down,threshold=threshold,layout.style=2,filename=paste(FILENAME,"-NRgraph-Threshold",threshold,"-Dropped-Posterior-",sep=""),drop.vertices=T)
```

Supplementary Material for “High-Throughput Toxicogenomic Screening of Chemicals in the Environment Using Metabolically Competent Hepatic Cell Cultures”

```
save(NR.post.reduced,file=paste(FILENAME,"-NRgraph-Threshold",threshold,"-Dropped-Posterior-Graph-",Sys.Date(),".RData",sep=""))
```

```
load("HepaRG-ToxCast-Apr2018All-PREJAGS.RData")
```

```
hep.heatmap <- matrix(0,ncol=Num.Genes,nrow=length(Chem.Full.Names))
```

```
colnames(hep.heatmap) <- NR.genes
```

```
rownames(hep.heatmap) <- Chem.Full.Names
```

```
NR.heatmap <- matrix(0,nrow=length(Chem.Full.Names),ncol=Num.NR)
```

```
colnames(NR.heatmap) <- NRs
```

```
rownames(NR.heatmap) <- Chem.Full.Names
```

```
rownames(NR.response) <- Chem.Full.Names
```

```
for (this.chem in Chem.Full.Names)
```

```
{
```

```
print(this.chem)
```

```
max.conc <- max(Concs.Tested[Chem.Full.Names==this.chem],na.rm=T)
```

```
for (this.gene in NR.genes)
```

```
{
```

```
  this.data <- subset(hepdata,gene==this.gene&casn==Chem.Names[Chem.Full.Names==this.chem])
```

```
  if (any(this.data$state==2))
```

```
  {
```

```
    ac50 <- subset(this.data,state==2)
```

```
    ac50 <- min(ac50$conc)
```

```
    hep.heatmap[this.chem,this.gene] <- max.conc-ac50
```

```
  } else if (any(this.data$state==3)) {
```

```
    ac50 <- subset(this.data,state==3)
```

```
    ac50 <- min(ac50$conc)
```

```
    hep.heatmap[this.chem,this.gene] <- ac50-max.conc
```

```
  }
```

```
}
```

```
for (this.NR in 1:Num.NR)
```

```
{
```

```
  if (!is.na(NR.response[this.chem,this.NR])) NR.heatmap[this.chem,this.NR] <-max.conc-  
  NR.response[this.chem,this.NR]
```

```
}
```

```
}
```

```
ht1 = Heatmap(hep.heatmap, name = "ht1",show_row_names=F,col = colorRamp2(c(-3.5, 0, 3.5), c("red",  
"white", "green")),row_title = "ToxCast Chemicals",column_title="Active Ref. Chem.  
Genes",heatmap_legend_param = list(title = "Potency\n(Up/Down)", at = c(-3,-1, 0,1,3),labels =c("0.1 uM  
(down)","10 uM (down)","> 100 uM","10 uM (up)","0.1 uM (up)"),color_bar = "discrete"))
```

Supplementary Material for “High-Throughput Toxicogenomic Screening of Chemicals in the Environment Using Metabolically Competent Hepatic Cell Cultures”

```
ht2 = Heatmap(NR.heatmap, name = "ht2", show_row_names=F, col = colorRamp2(c(-3.5, 0, 3.5), c("red",  
"white", "green")), row_title = "ToxCast Chemicals", column_title="Inferred NR  
Activation", show_heatmap_legend =F)
```

```
ht2+ht1
```

```
write.csv(hep.heatmap, file=paste("ToxCast-GeneActivity-", Sys.Date(), ".txt", sep=""))  
write.csv(NR.heatmap, file=paste("ToxCast-NRInference-", Sys.Date(), ".txt", sep=""))
```



## JAGS Code for Bayesian Analysis

HepaRG-Ref-Step1-Jul17-2017-07-20.jags

```
#-----  
# Name: HepaRG-Ref-Step1-Jul17-2017-07-20.jags  
# Description: A JAGS model for drawing inference of Nuclear Receptor (NR)  
# activation from gene expression data  
#  
# Author: John Wambaugh, based on code by Robert Pearce  
#  
# Created: Thu Nov 2 15:02:27 2017  
#-----
```

```
model {  
  
  for (i in 1:Num.Chems) {  
    for (j in 1:Num.NR) {  
      NR.AC50.index[i,j] ~ dcat(NR.Chem.Prior[i,,j])  
      NR.AC50[i,j] <- Chem.Possible.AC50s[i,NR.AC50.index[i,j]]  
    }  
  }  
  
  for (i in 1:Num.Chems) {  
    for (j in 1:Num.Concs[i]) {  
      NR.state[i,j] <- 1 + 1*step(Concs.Tested[i,j]-NR.AC50[i,1])  
    }  
  }  
  
  # From mclark:  
  # Half-cauchy as in Gelman 2006  
  # If scale parameter in cauchy is 5, precision of z = 1/5^2 = 0.04  
  # sigma int  
  # sd_int <- zInt/sqrt(chSqInt) # prior for sigma; cauchy = normal/sqrt(chi^2)  
  # zInt ~ dnorm(0, .04)|(0,)  
  # chSqInt ~ dgamma(0.5, 0.5) # chi^2 with 1 d.f.  
  # Carvalho Horseshoe prior as coded by Allen Riddell:  
  tau ~ dt(0, 1, 1)T(0,)  
  
  for (i in 1:Num.Genes) {  
    for (j in 1:Num.NR) {  
      lambda[i,j] ~ dt(0, 1, 1)T(0,)  
      NR.Gene.Network[i,j] ~ dnorm(0,lambda[i,j] * tau)T(-50,50)  
    }  
  }  
  
  Lit.Threshold ~ dunif(0,50)  
  log.Lit.Obs.Precision ~ dunif(-7,1)  
  Lit.Obs.Precision <- 10^log.Lit.Obs.Precision
```

Supplementary Material for “High-Throughput Toxicogenomic Screening of Chemicals in the Environment Using Metabolically Competent Hepatic Cell Cultures”

```
for (i in 1:Num.Lit.Obs) {
  Lit.Obs[i] ~ dnorm(abs(NR.Gene.Network[Lit.Obs.Gene[i],Lit.Obs.NR[i]]),Lit.Obs.Precision)
  is.Censored.Lit.Obs[i] ~ dinterval(Lit.Obs[i],Lit.Threshold)
}

for (i in 1:Num.Genes)
{
  P2min[i] ~ dunif(0.0001,0.5)
  P3min[i] ~ dunif(0.0001,0.5)
}

Network.Response[,2] <- NR.Gene.Network

P2 <- (Network.Response+abs(Network.Response))/2
P3 <- (abs(Network.Response)-Network.Response)/2

# We have three behaviors we want to ensure:
# 1) P2 and P3 are always non-zero (assay noise or stimulus by other receptors
#   not modeled)
# 2) P1 does not go to zero when many NR's are active (assay noise again)
# 3) The stiffness of P1 -- is it switch like (immediately drops for any NR
#   activation) or more gradual?

# We also want to weight the data for the replicate plates, without having to
# replicate the data. Need to do a weird fix to the dcat distribution to do this.
# Basically, the density d for n replicates is d^n. In order to achieve this with
# a categorical distribution, we need a fourth category that soaks up the remaining
# probability, otherwise our correctin will get messed up when dcat renormalizes
# everything.

for (i in 1:Num.Obs)
{
  PW[i,1] <- 1 - P2min[Obs.Gene[i]] - P3min[Obs.Gene[i]]
  PW[i,2] <- P2min[Obs.Gene[i]]+P2[Obs.Gene[i],NR.state[Obs.Chem[i],Obs.Conc[i]]]
  PW[i,3] <- P3min[Obs.Gene[i]]+P3[Obs.Gene[i],NR.state[Obs.Chem[i],Obs.Conc[i]]]
  Obs.State[i] ~ dcat(PW[i,])
}
}
```

HepaRG-Ref-Step2-Nov2017-2017-11-30.jags

```
#-----  
# Name: HepaRG-Ref-Step2-Nov2017-2017-11-30.jags  
# Description: A JAGS model for drawing inference of Nuclear Receptor (NR)  
# activation from gene expression data  
#  
# Author: John Wambaugh, based on code by Robert Pearce  
#  
# Created: Mon Dec 4 09:38:22 2017  
#-----
```

```
model {  
  
  for (i in 1:Num.Chems) {  
    for (j in 1:Num.NR) {  
      NR.AC50.index[i,j] ~ dcat(NR.Chem.Prior[i,,j])  
      NR.AC50[i,j] <- Chem.Possible.AC50s[i,NR.AC50.index[i,j]]  
    }  
  }  
  
  for (i in 1:Num.Chems) {  
    for (j in 1:Num.Concs[i]) {  
      NR.state[i,j] <- 1 + 32*step(Concs.Tested[i,j]-NR.AC50[i,1]) + 16*step(Concs.Tested[i,j]-NR.AC50[i,2]) +  
8*step(Concs.Tested[i,j]-NR.AC50[i,3]) + 4*step(Concs.Tested[i,j]-NR.AC50[i,4]) +  
2*step(Concs.Tested[i,j]-NR.AC50[i,5]) + 1*step(Concs.Tested[i,j]-NR.AC50[i,6])  
    }  
  }  
  
  # From mclark:  
  # Half-cauchy as in Gelman 2006  
  # If scale parameter in cauchy is 5, precision of z = 1/5^2 = 0.04  
  # sigma int  
  # sd_int <- zInt/sqrt(chSqInt) # prior for sigma; cauchy = normal/sqrt(chi^2)  
  # zInt ~ dnorm(0, .04)|(0,)   
  # chSqInt ~ dgamma(0.5, 0.5) # chi^2 with 1 d.f.  
  # Carvalho Horseshoe prior as coded by Allen Riddell:  
  tau ~ dt(0, 1, 1)T(0,)   
  
  for (i in 1:Num.Genes) {  
    for (j in 1:Num.NR) {  
      lambda[i,j] ~ dt(0, 1, 1)T(0,)   
      NR.Gene.Network[i,j] ~ dnorm(0,lambda[i,j] * tau)T(-50,50)  
    }  
  }  
  
  Lit.Threshold ~ dunif(0,50)  
  log.Lit.Obs.Precision ~ dunif(-7,1)  
  Lit.Obs.Precision <- 10^log.Lit.Obs.Precision
```

Supplementary Material for “High-Throughput Toxicogenomic Screening of Chemicals in the Environment Using Metabolically Competent Hepatic Cell Cultures”

```
for (i in 1:Num.Lit.Obs) {
  Lit.Obs[i] ~ dnorm(abs(NR.Gene.Network[Lit.Obs.Gene[i],Lit.Obs.NR[i]]),Lit.Obs.Precision)
  is.Signif.Lit.Obs[i] ~ dinterval(Lit.Obs[i],Lit.Threshold)
}

for (i in 1:Num.Genes)
{
  P2min[i] ~ dunif(0.0001,0.5)
  P3min[i] ~ dunif(0.0001,0.5)
}

Network.Response <- NR.Gene.Network %**% NR.cat.boolean

P2 <- (Network.Response+abs(Network.Response))/2
P3 <- (abs(Network.Response)-Network.Response)/2

# We have three behaviors we want to ensure:
# 1) P2 and P3 are always non-zero (assay noise or stimulus by other receptors
#   not modeled)
# 2) P1 does not go to zero when many NR's are active (assay noise again)
# 3) The stiffness of P1 -- is it switch like (immediately drops for any NR
#   activation) or more gradual?

# We also want to weight the data for the replicate plates, without having to
# replicate the data. Need to do a weird fix to the dcat distribution to do this.
# Basically, the density d for n replicates is d^n. In order to achieve this with
# a categorical distribution, we need a fourth category that soaks up the remaining
# probability, otherwise our correctin will get messed up when dcat renormalizes
# everything.

for (i in 1:Num.Obs)
{
  PW[i,1] <- 1 - P2min[Obs.Gene[i]] - P3min[Obs.Gene[i]]
  PW[i,2] <- P2min[Obs.Gene[i]]+P2[Obs.Gene[i],NR.state[Obs.Chem[i],Obs.Conc[i]]]
  PW[i,3] <- P3min[Obs.Gene[i]]+P3[Obs.Gene[i],NR.state[Obs.Chem[i],Obs.Conc[i]]]
  Obs.State[i] ~ dcat(PW[i,])
}
}
```

HepaRG-ToxCast-Apr2018All-2018-04-23.jags

```
#-----
# Name: HepaRG-ToxCast-Apr2018All-2018-04-23.jags
# Description: A JAGS model for drawing inference of Nuclear Receptor (NR)
# activation from gene expression data
#
# Author: John Wambaugh, based on code by Robert Pearce
#
# Created: Mon Apr 23 10:16:18 2018
#-----

model {
  for (i in 1:Num.Chems) {
    for (j in 1:Num.NR) {
      NR.AC50.index[i,j] ~ dcat(NR.Chem.Prior[i,])
    }
  }

  for (i in 1:Num.Chems) {
    for (j in 1:Num.Concs[i]) {
      NR.state[i,j] <- 1 + 32*step(Concs.Tested[i,j]-Chem.Possible.AC50s[NR.AC50.index[i,1]]) +
      16*step(Concs.Tested[i,j]-Chem.Possible.AC50s[NR.AC50.index[i,2]]) + 8*step(Concs.Tested[i,j]-
      Chem.Possible.AC50s[NR.AC50.index[i,3]]) + 4*step(Concs.Tested[i,j]-
      Chem.Possible.AC50s[NR.AC50.index[i,4]]) + 2*step(Concs.Tested[i,j]-
      Chem.Possible.AC50s[NR.AC50.index[i,5]]) + 1*step(Concs.Tested[i,j]-
      Chem.Possible.AC50s[NR.AC50.index[i,6]])
    }
  }

  P.multi ~ dmnorm(P.multi.mu,P.multi.omega)

  # Read in the P2 and P3 min from the multivariate normal:
  for (i in 1:Num.Genes)
  {
  # Multivariate normal distribution doesn't allow truncation:
  P2min[i] <- max(0.0001,min(0.5,P.multi[i]))
  P3min[i] <- max(0.0001,min(0.5,P.multi[Num.Genes+i]))
  }

  NR.Network.0 ~ dmnorm(rep(0,length(NR.network.prior.mu)),NR.network.prior.omega)
  NR.Network <- NR.network.prior.mu+NR.Network.0*%NR.network.prior.mu

  # Read in the non-zero weights from the multivariate normal:
  for (i in 1:Num.non.zero.weights)
  {
  NR.Gene.Network[non.zero.gene[i],non.zero.NR[i]] <- NR.Network[i]
  }
}
```

Supplementary Material for “High-Throughput Toxicogenomic Screening of Chemicals in the Environment Using Metabolically Competent Hepatic Cell Cultures”

```
Network.Response <- NR.Gene.Network %*% NR.cat.boolean
P2 <- (Network.Response+abs(Network.Response))/2
P3 <- (abs(Network.Response)-Network.Response)/2

# We have three behaviors we want to ensure:
# 1) P2 and P3 are always non-zero (assay noise or stimulus by other receptors
#   not modeled)
# 2) P1 does not go to zero when many NR's are active (assay noise again)
# 3) The stiffness of P1 -- is it switch like (immediately drops for any NR
#   activation) or more gradual?

# We also want to weight the data for the replicate plates, without having to
# replicate the data. Need to do a weird fix to the dcat distribution to do this.
# Basically, the density d for n replicates is d^n. In order to achieve this with
# a categorical distribution, we need a fourth category that soaks up the remaining
# probability, otherwise our correctin will get messed up when dcat renormalizes
# everything.

for (i in 1:Num.Genes)
{
  for (j in 1: 64 )
  {
    PW[i,j,1] <- 1 - P2min[i] - P3min[i]
    PW[i,j,2] <- P2min[i]+P2[i,j]
    PW[i,j,3] <- P3min[i]+P3[i,j]
  }
}

for (i in 1:Num.Obs)
{
  Obs.State[i] ~ dcat(PW[Obs.Gene[i],NR.state[Obs.Chem[i],Obs.Conc[i]],])
}
}
```
